# Supplementary material for: Is development aid to strengthen health systems during protracted conflict a useful investment? The case of South Sudan, 2011–2015
Source: PubMed Central journal article supplement — BMJ Glob Health. 2020 Apr 15;5(4):e002093. doi: 10.1136/bmjgh-2019-002093 (PMC7199709; doi:10.1136/bmjgh-2019-002093), 2020-04-15

**Figure S1—Forest plot of difference between LQAS Surveys of 2011 and 2015 for: All indicators (Unity State is excluded)**

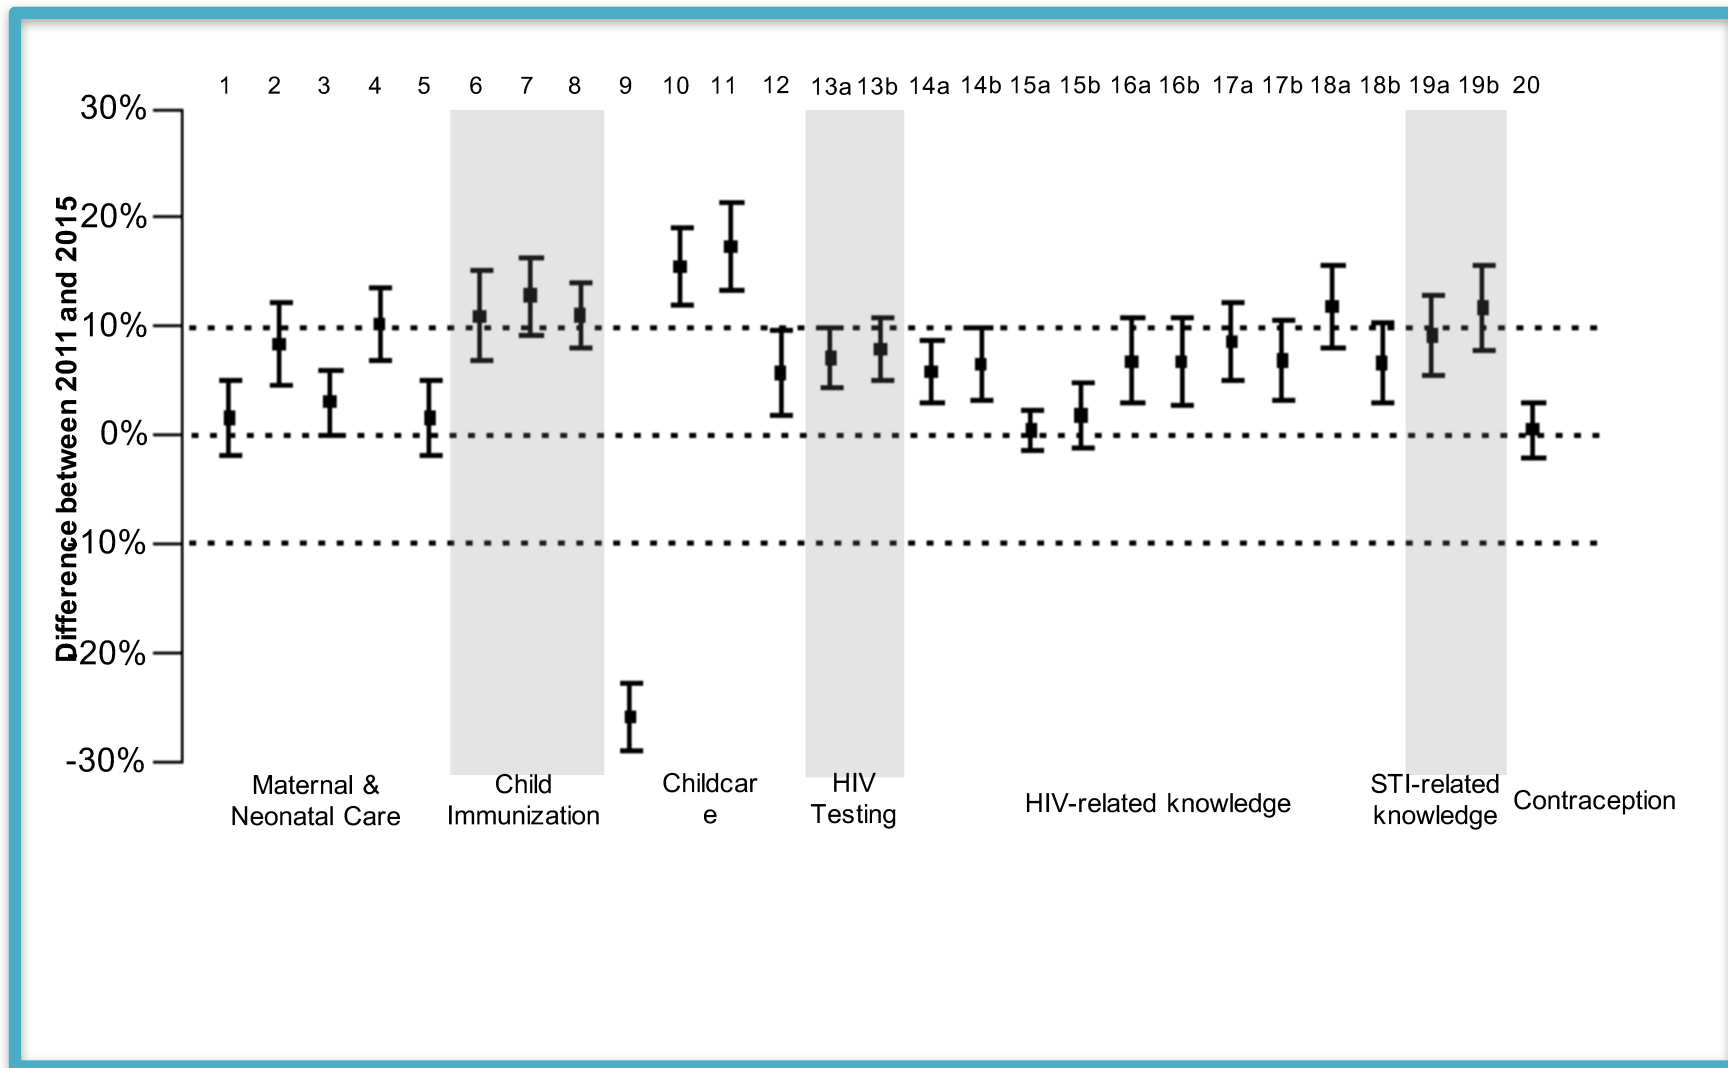

**Figure S2--Difference between LQAS Surveys of 2011 and 2015 for: had at least 4 ANC visits during last pregnancy (mother recall only)**

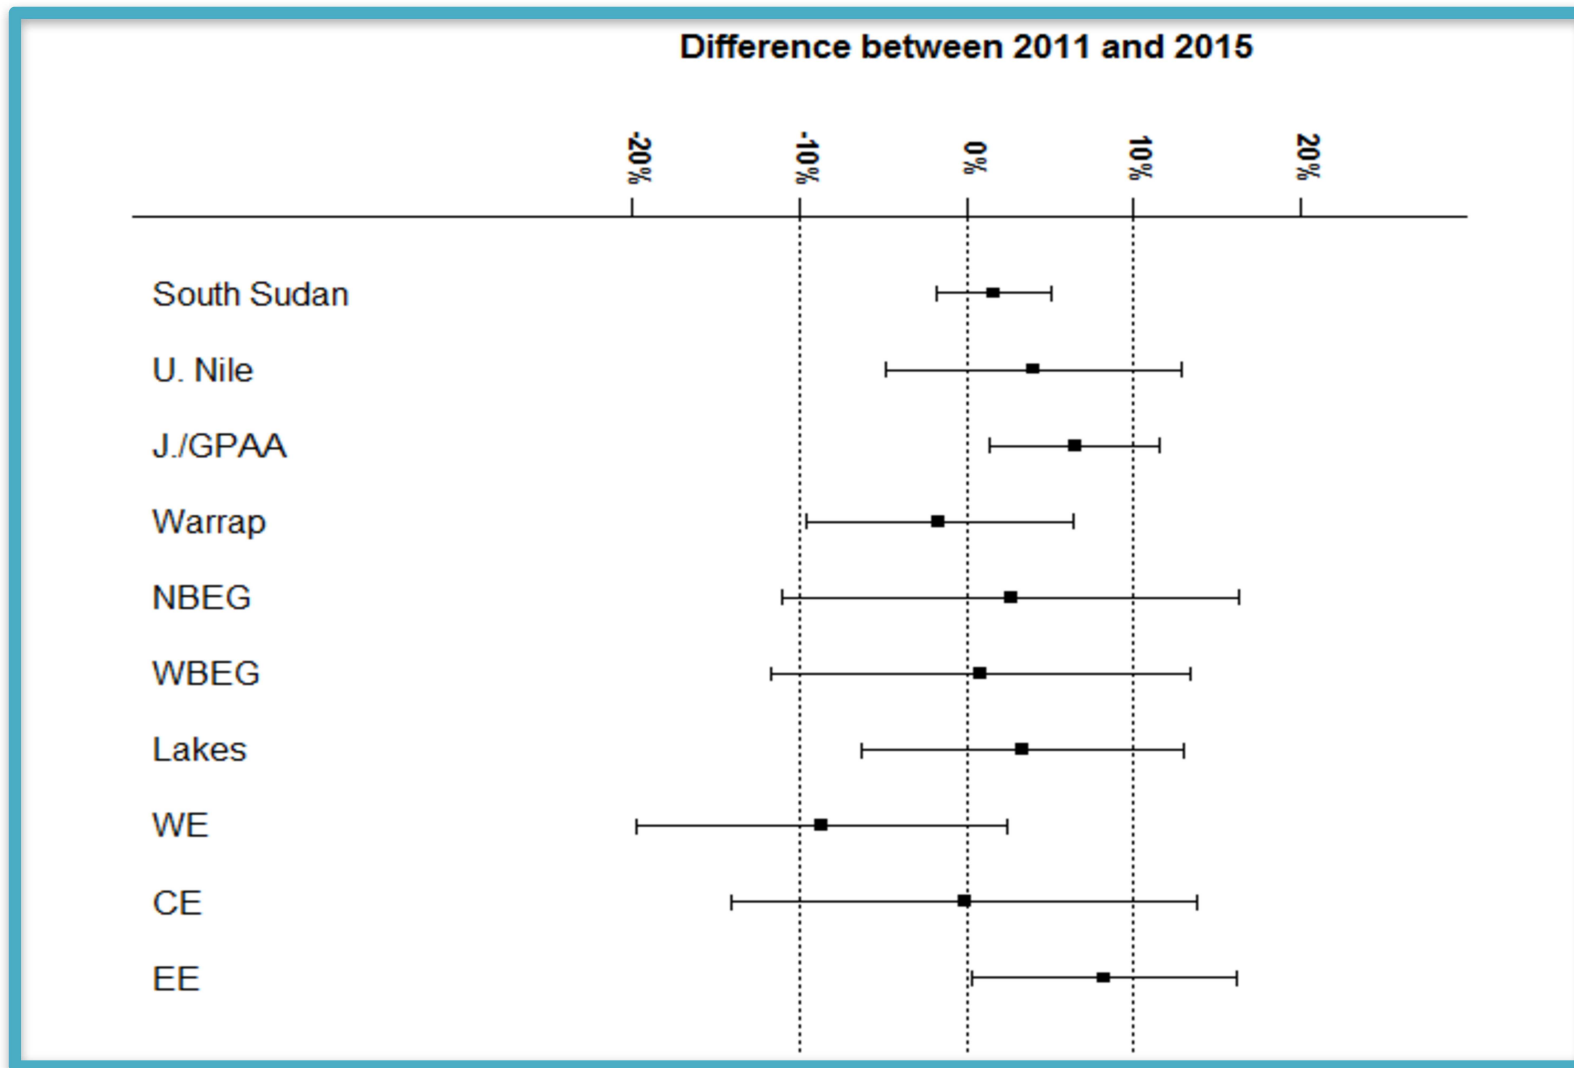

**Figure S3--Difference between LQAS Surveys of 2011 and 2015 for: Received two or more doses of SP Fansidar during their last pregnancy**

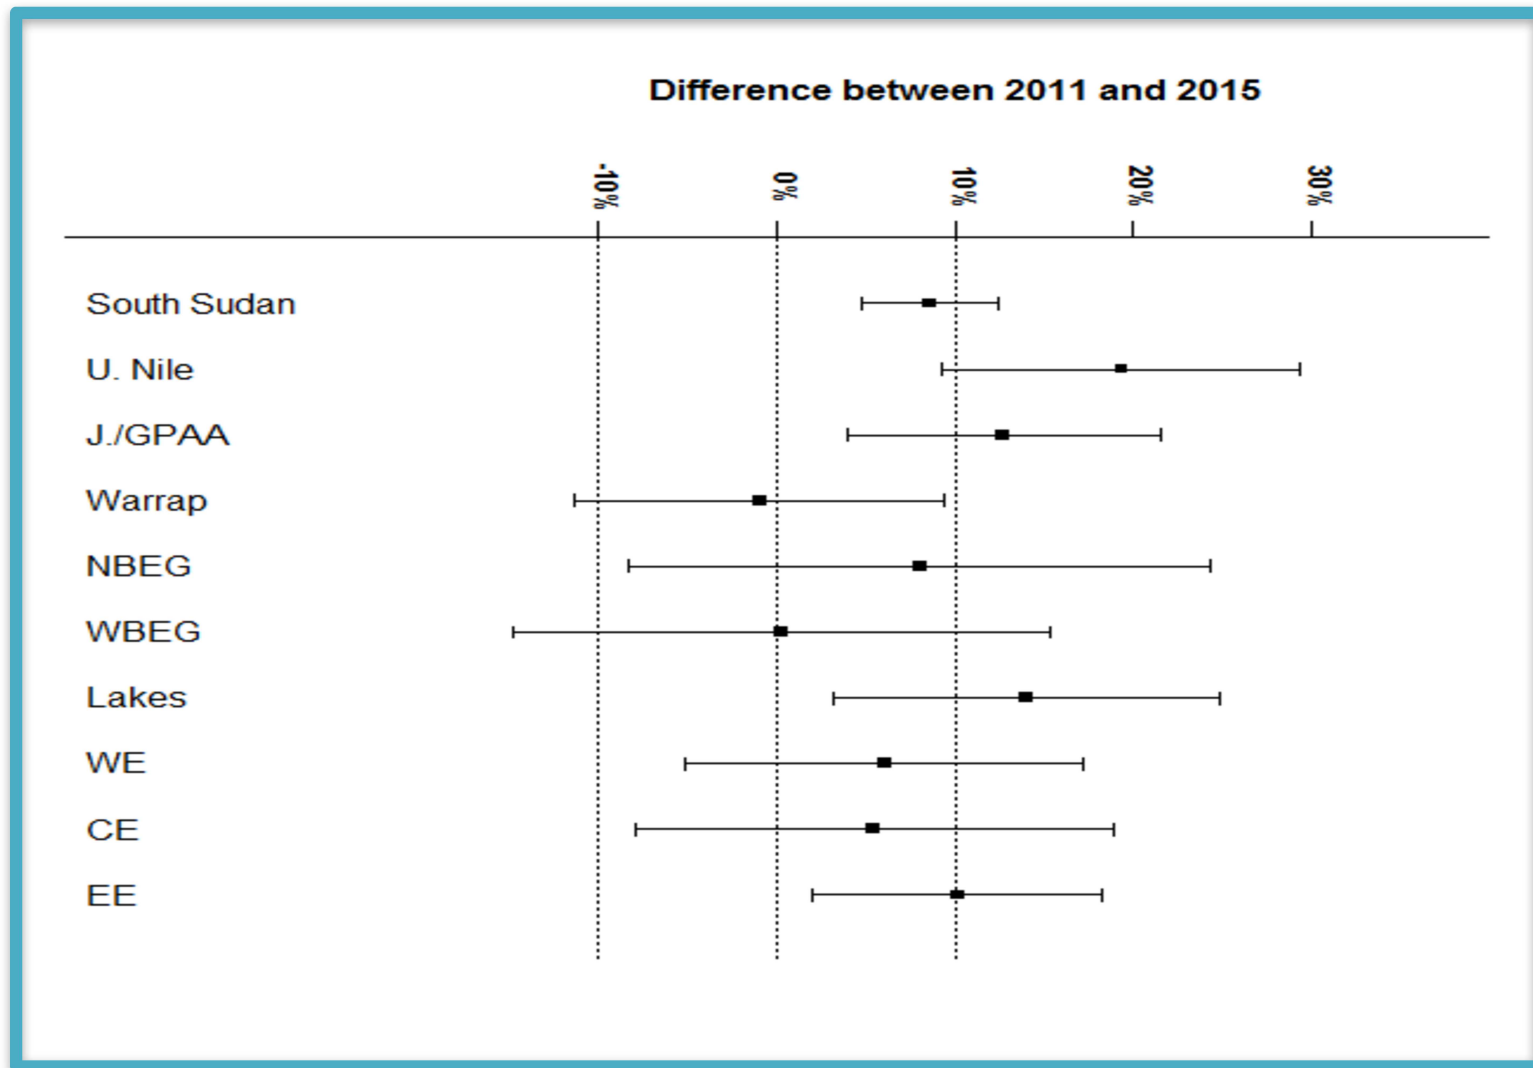

**Figure S4--Difference between LQAS Surveys of 2011 and 2015 for: Received two or more doses of tetanus toxoid during their last pregnancy or who had life time immunity (card confirmed only)**

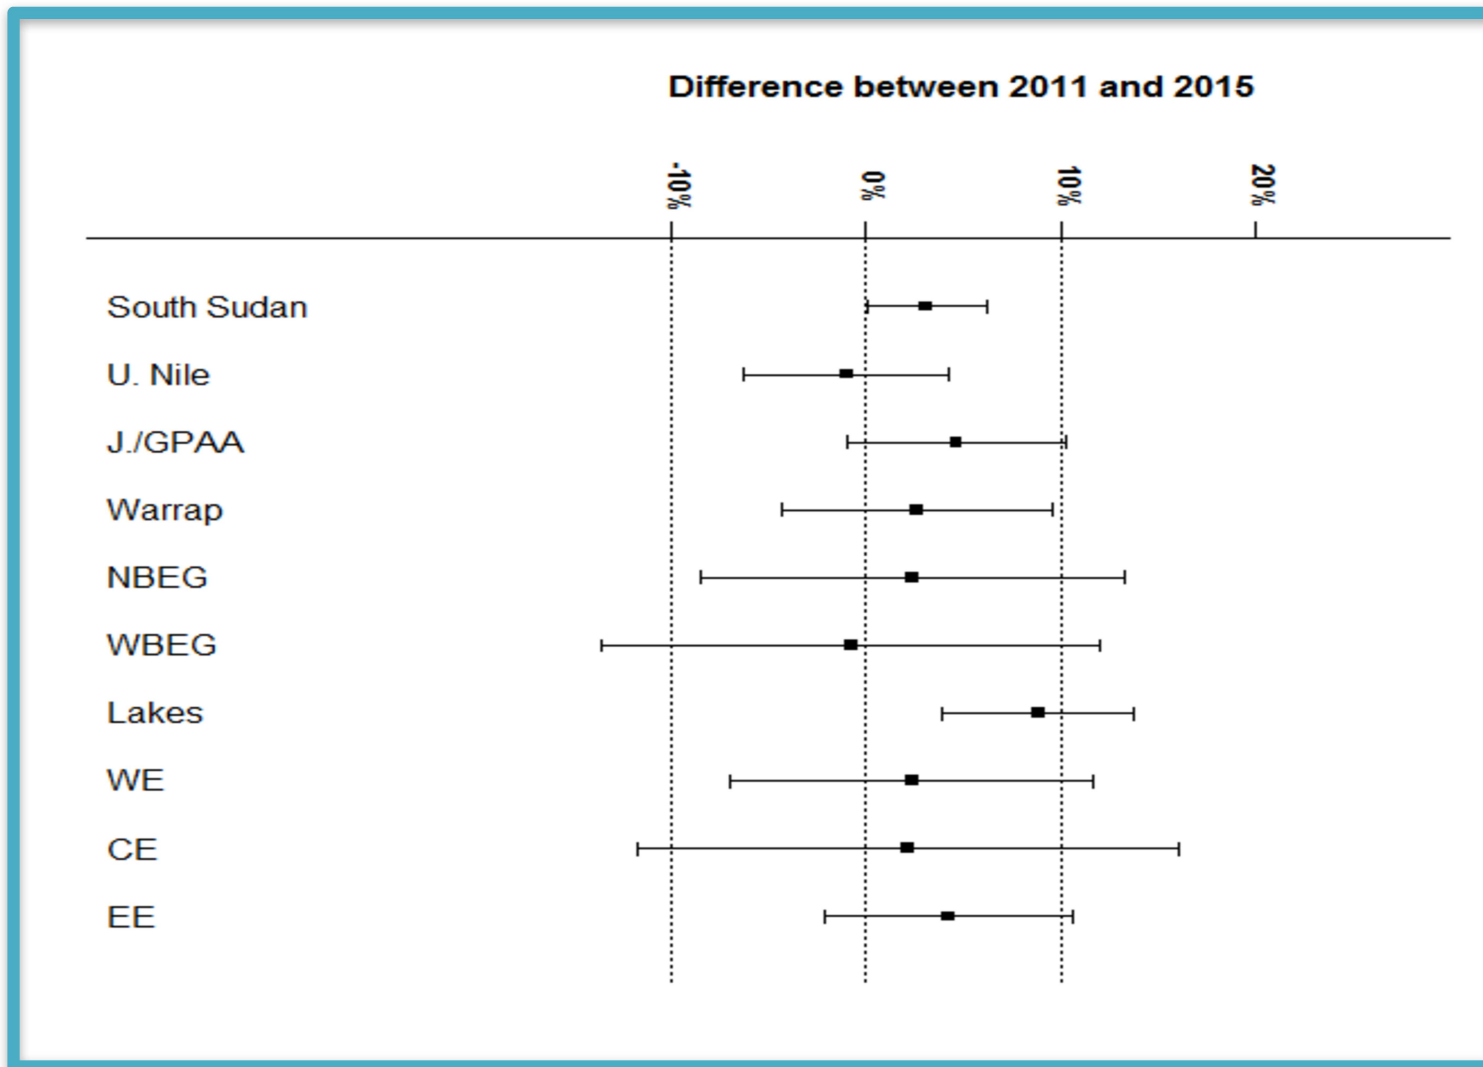



**Figure S5--Difference between LQAS Surveys of 2011 and 2015 for: Delivered in a health facility during last pregnancy**

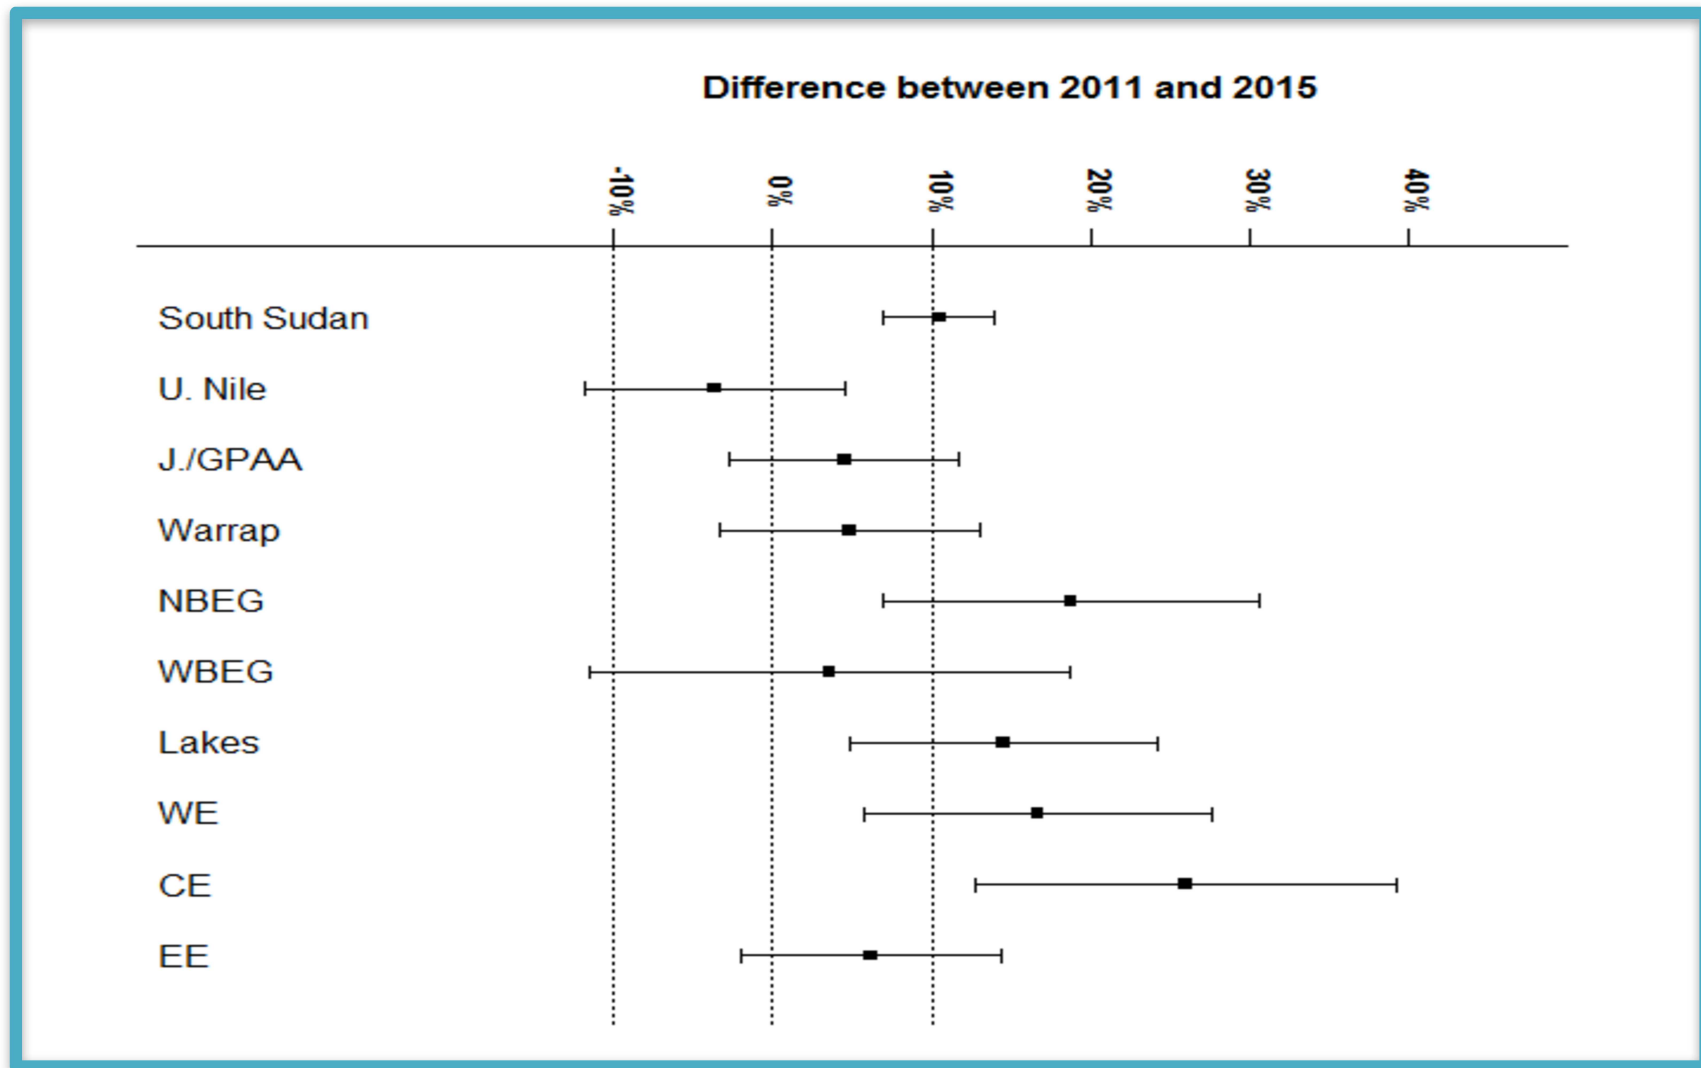

**Figure S6--Difference between LQAS Surveys of 2011 and 2015 for: Had at least one postpartum check-up within 6 weeks of delivery with any health professional**

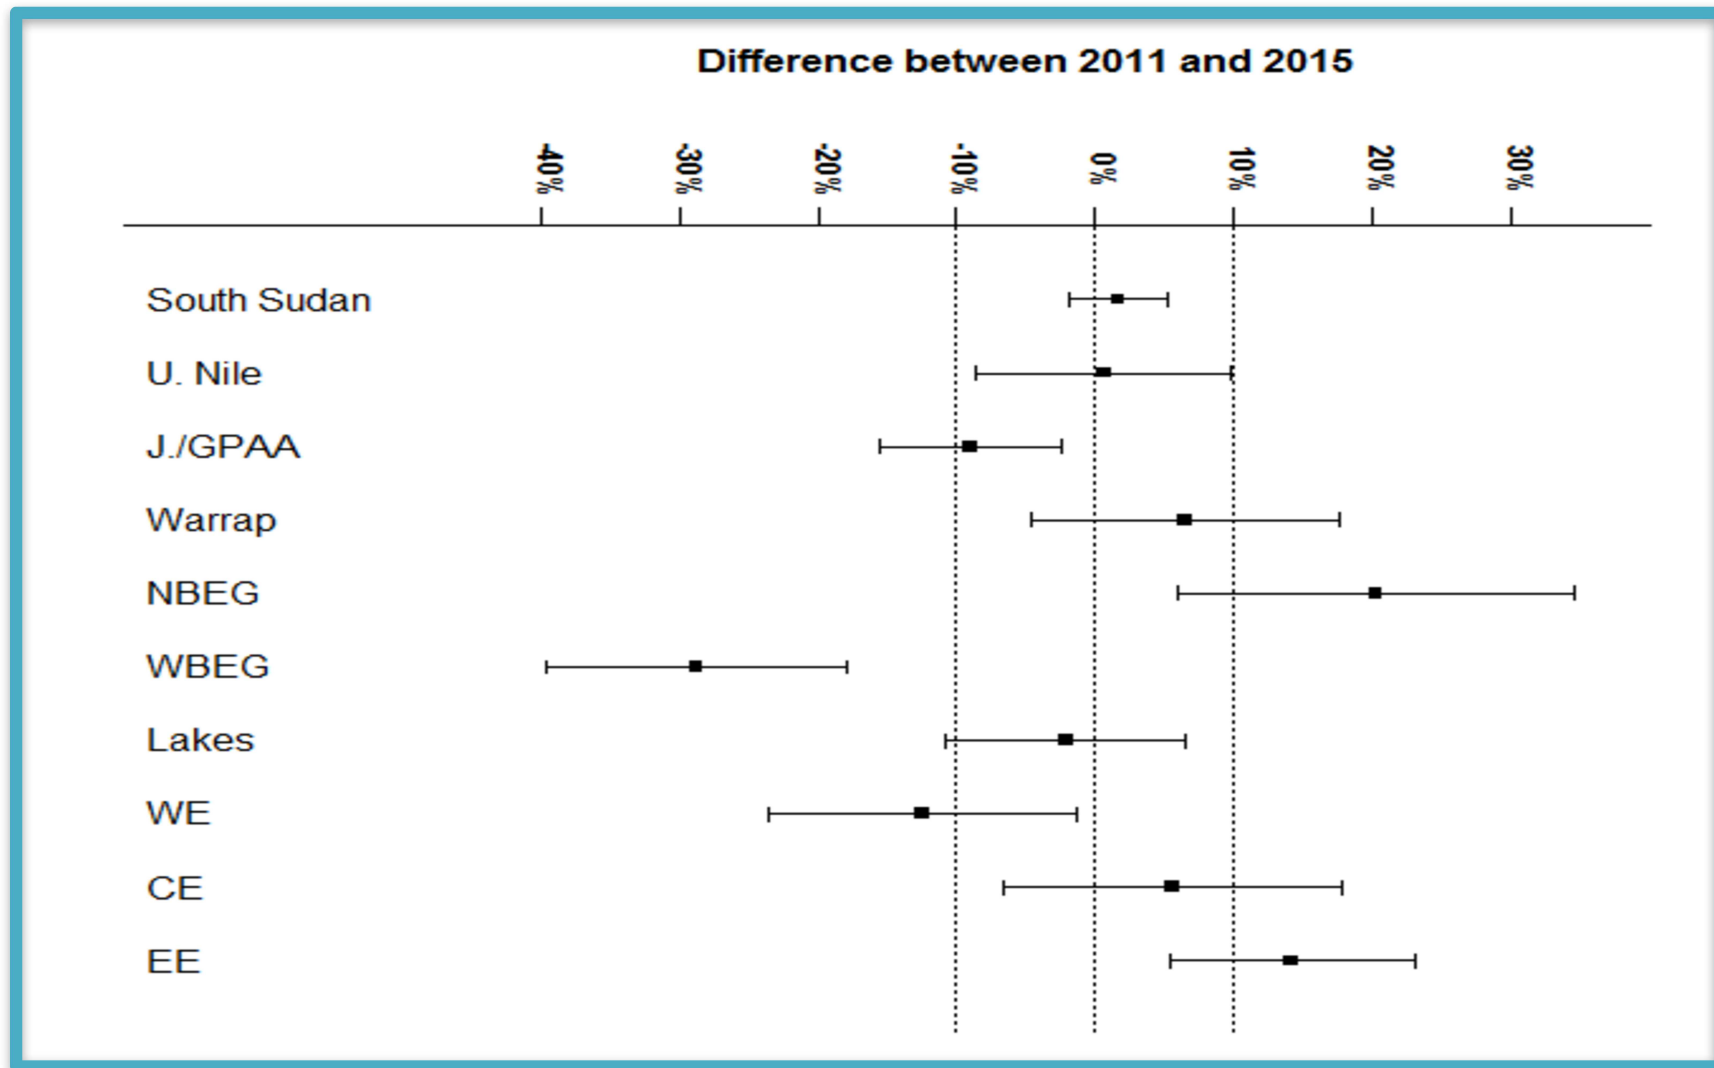

**Figure S7--Difference between LQAS Surveys of 2011 and 2015 for: Proportion of children 12–23 months who received a measles vaccine (mother recall and card confirmed)**

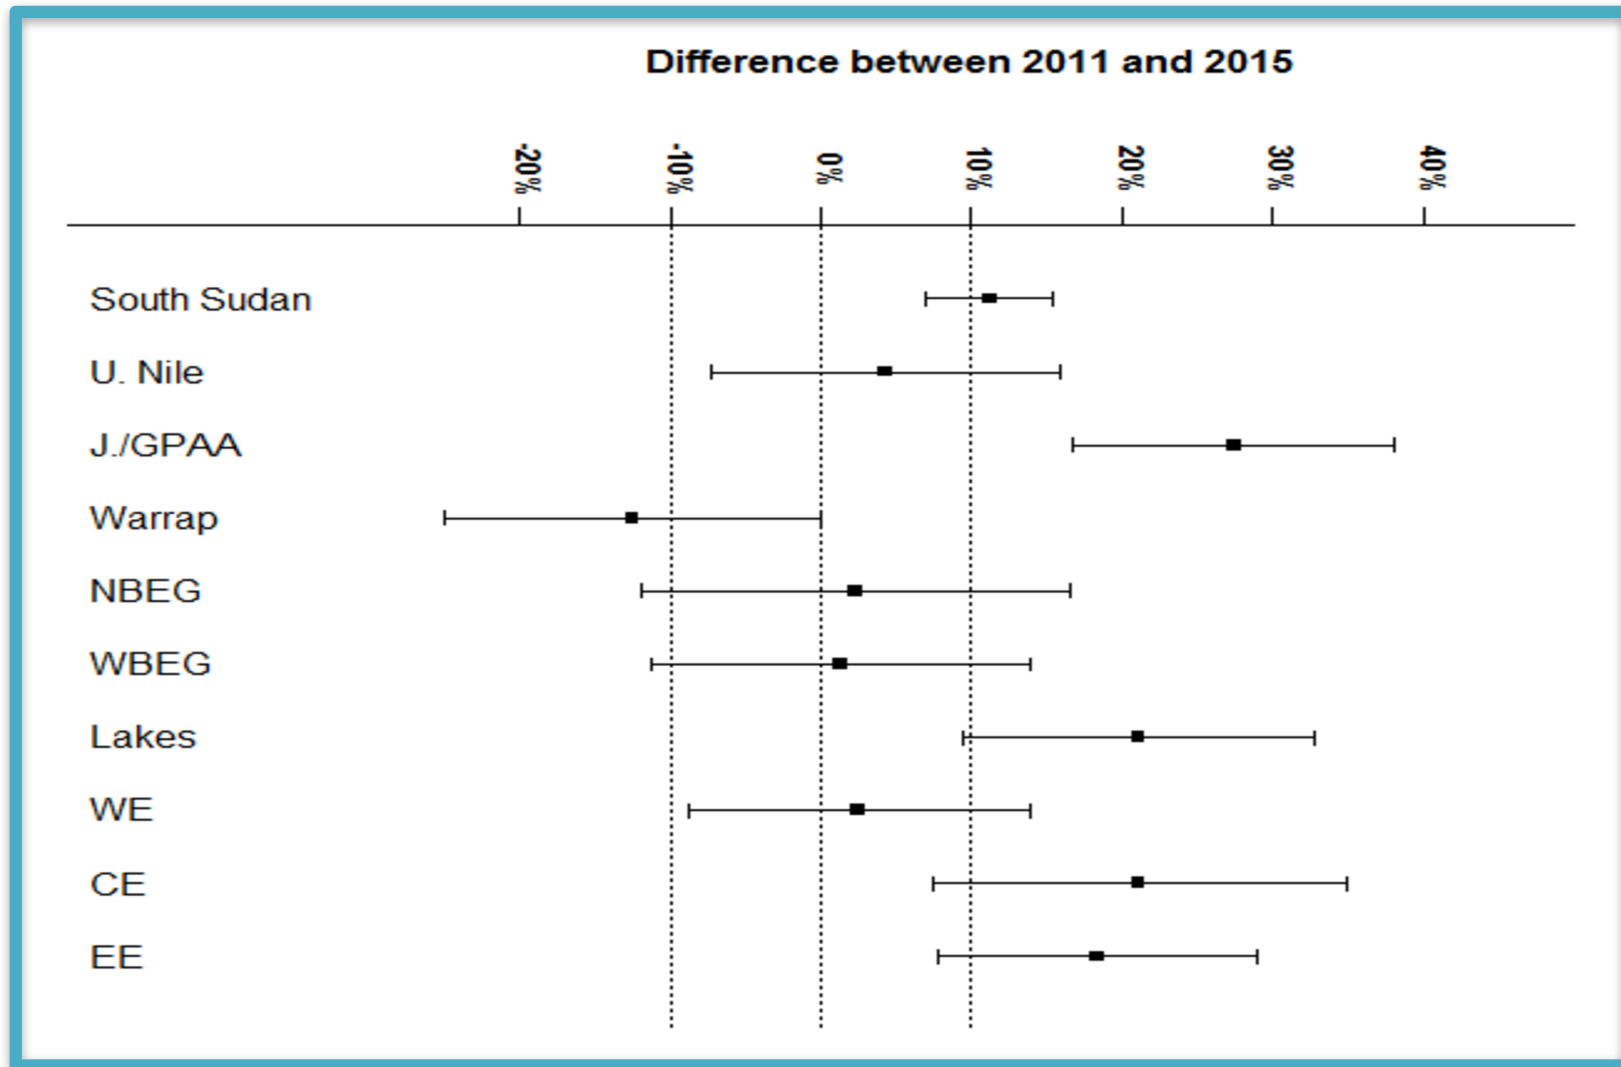

**Figure S8--Difference between LQAS Surveys of 2011 and 2015 for: Proportion of children 12–23 months who received DPT 3 vaccine (mother recall and card confirmed)**

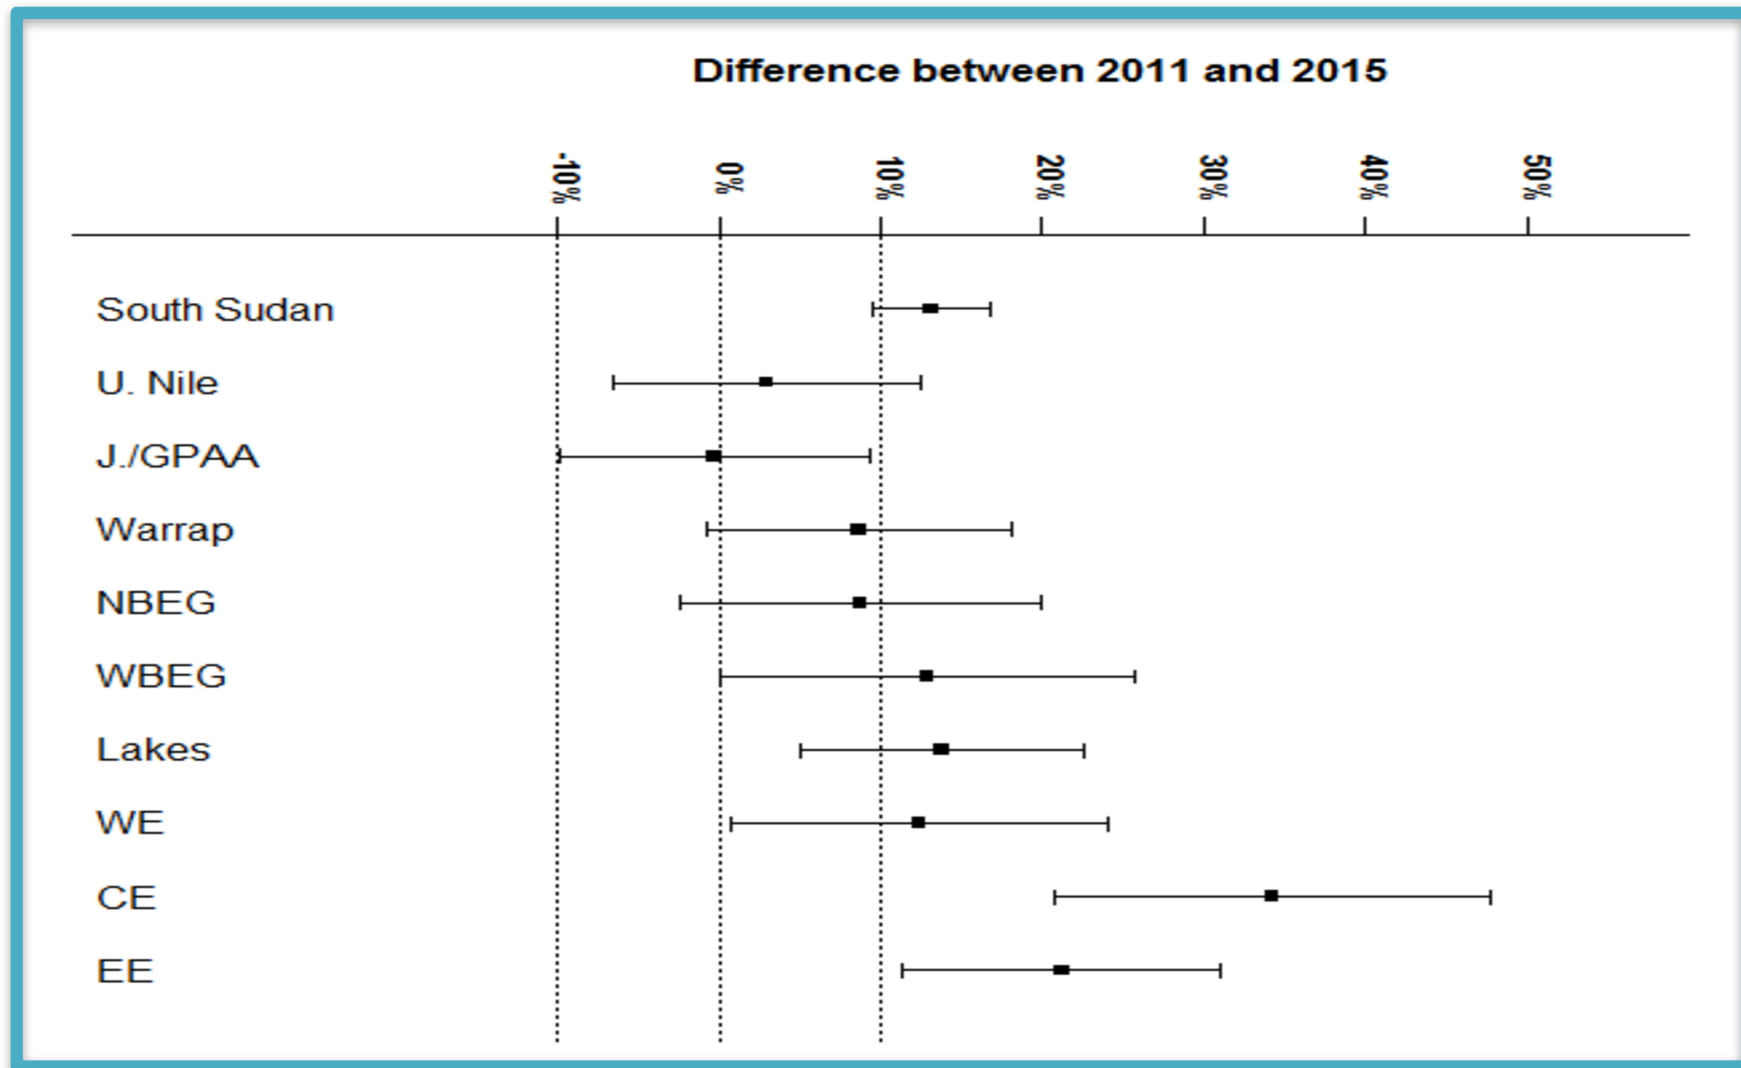

**Figure S9--Difference between LQAS Surveys of 2011 and 2015 for: Proportion of children 12–23 months who are fully vaccinated (BCG, DPT3, OPV3 and measles, mother recall and card confirmed)**

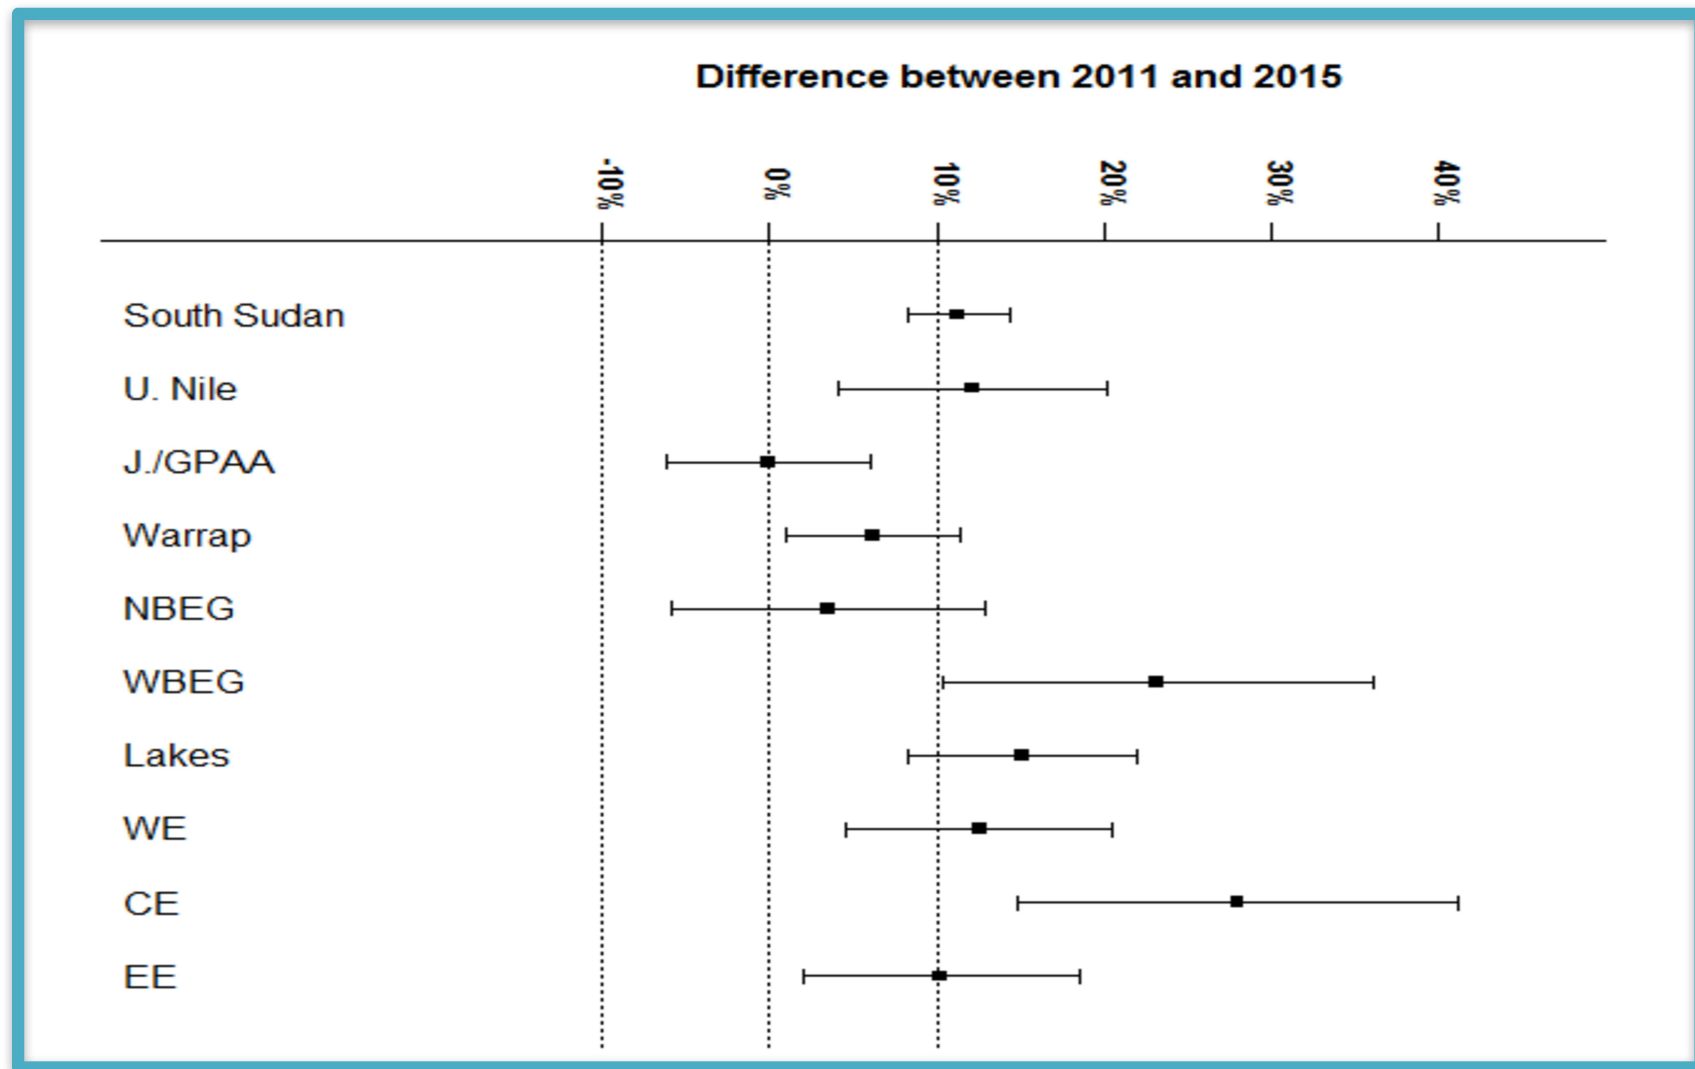

**Figure S10--Difference between LQAS Surveys of 2011 and 2015 for: Proportion of Children 6-59 months who received Vitamin A supplement in the last six months**

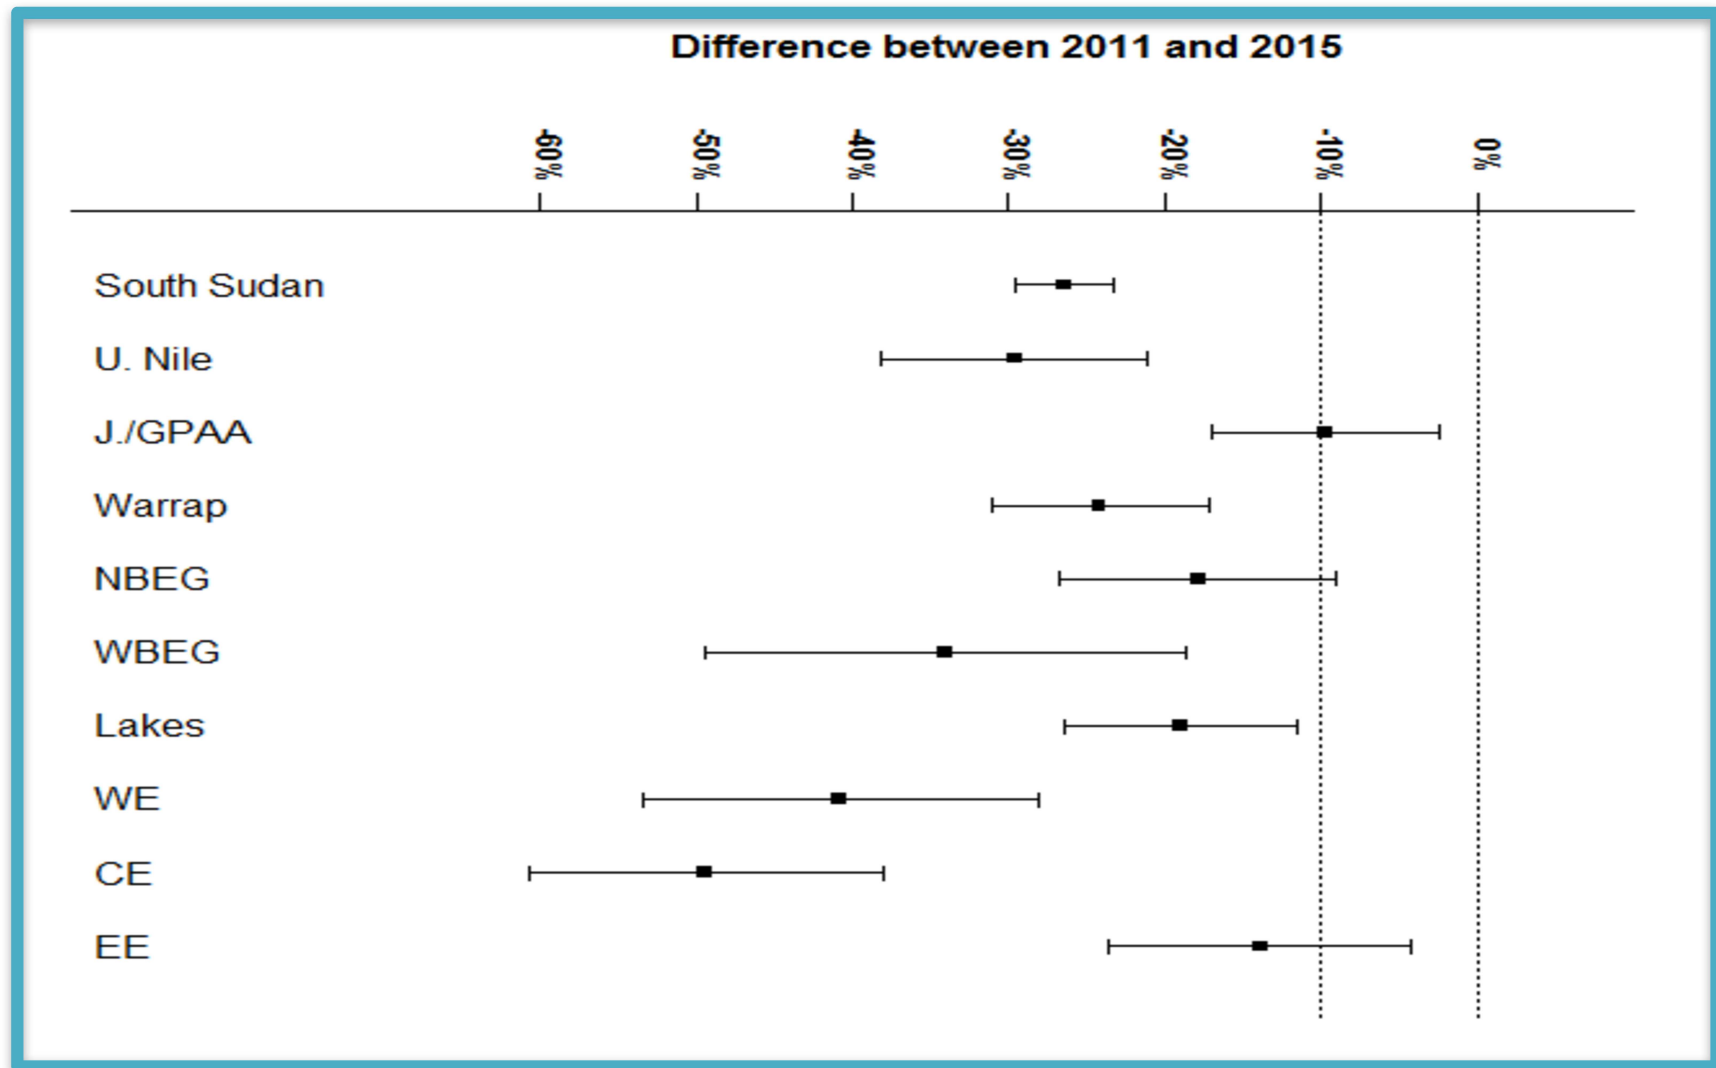

**Figure S11--Difference between LQAS Surveys of 2011 and 2015 for: Proportion of Children 0-59 months with fever in the last two weeks who were treated with an appropriate anti-malarial (as per national guidelines)**

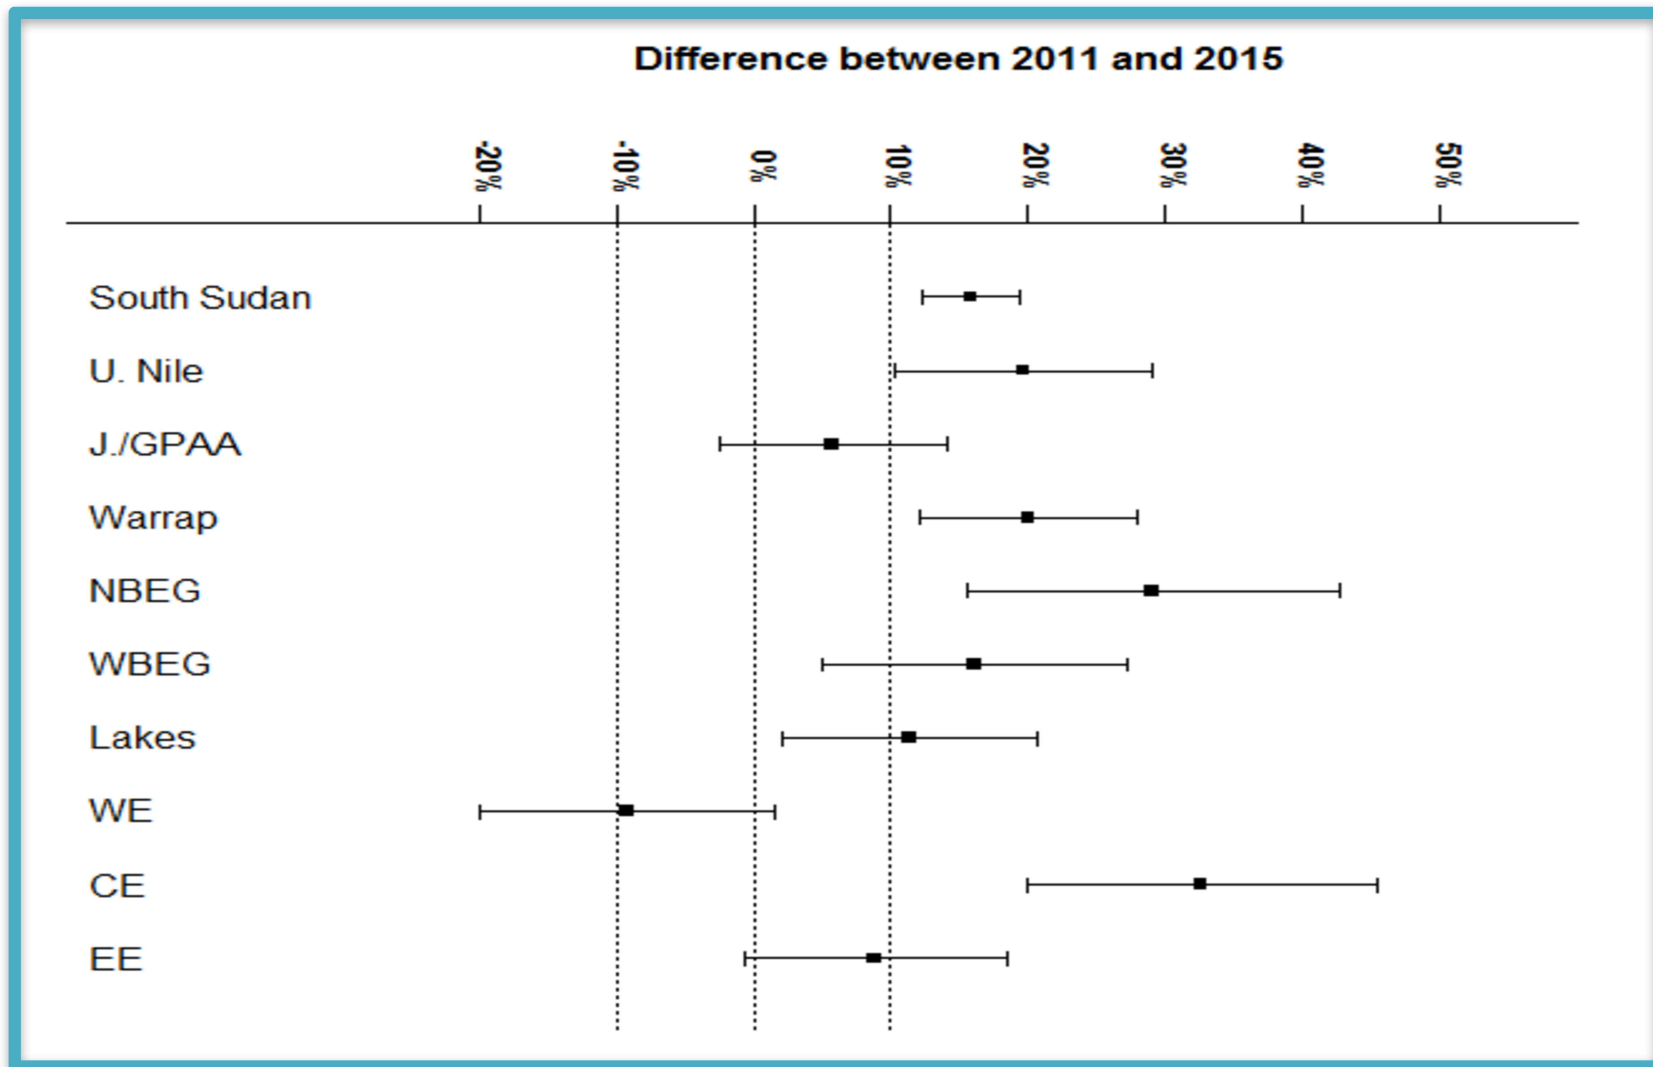

**Figure S12--Difference between LQAS Surveys of 2011 and 2015 for: Proportion of Children 0-59 months with diarrhea in the two weeks prior to the survey who were treated with ORS**

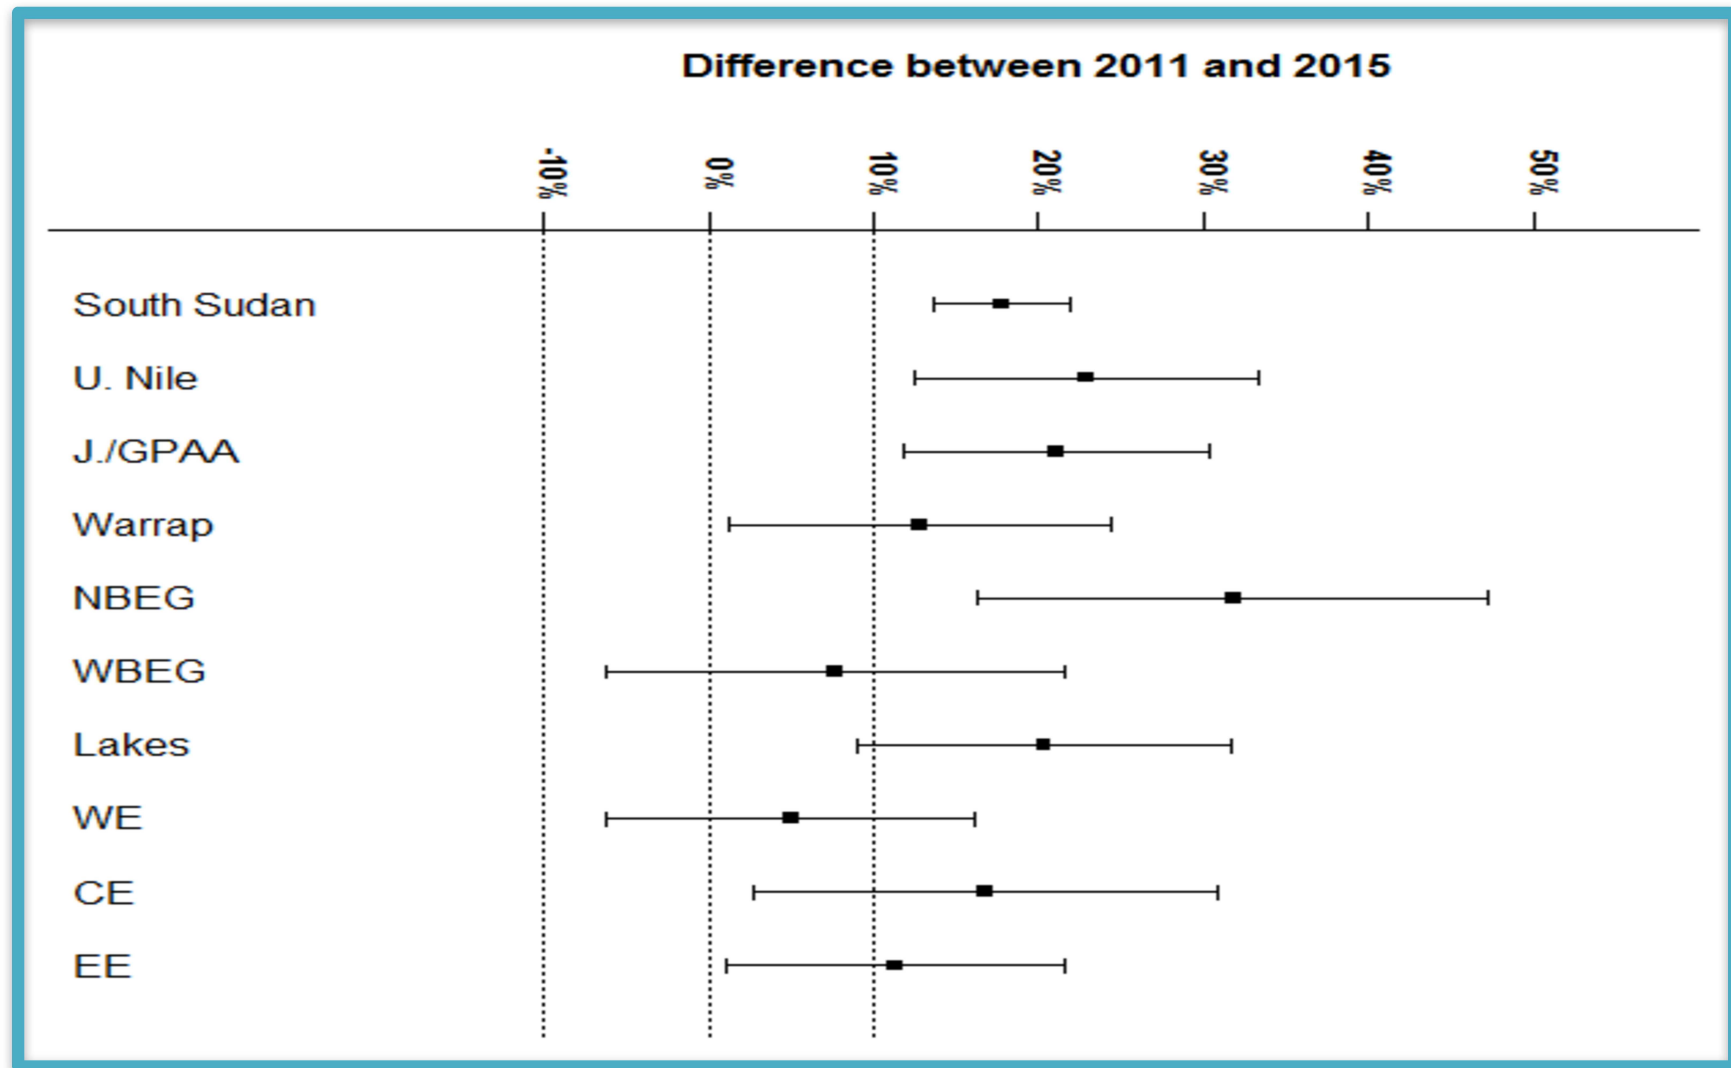



**Figure S13--Difference between LQAS Surveys of 2011 and 2015 for: Proportion of Children 0-59 months with cough and fast/difficult breathing in the last two weeks whose mothers sought advice or treatment from appropriate health provider**

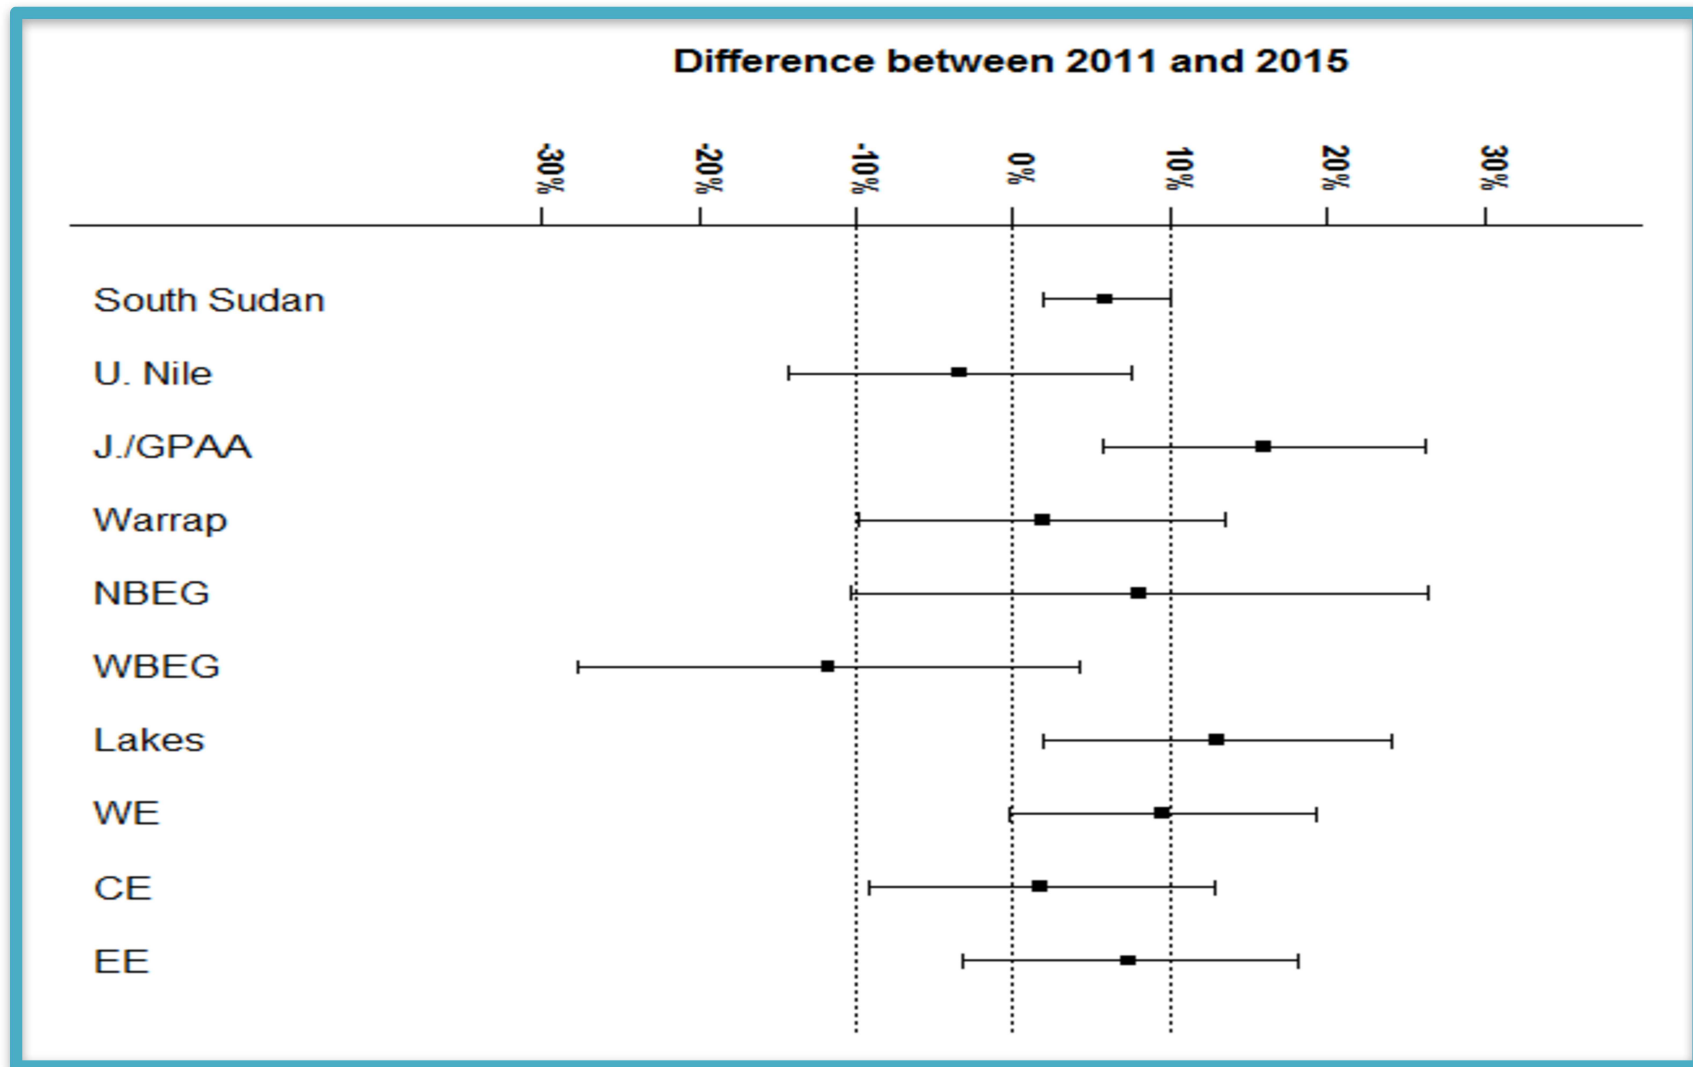

**Figure S14--Difference between LQAS Surveys of 2011 and 2015 for: Proportion of Proportion of women 15-49 years who were tested for HIV in the last 12 months and received their results**

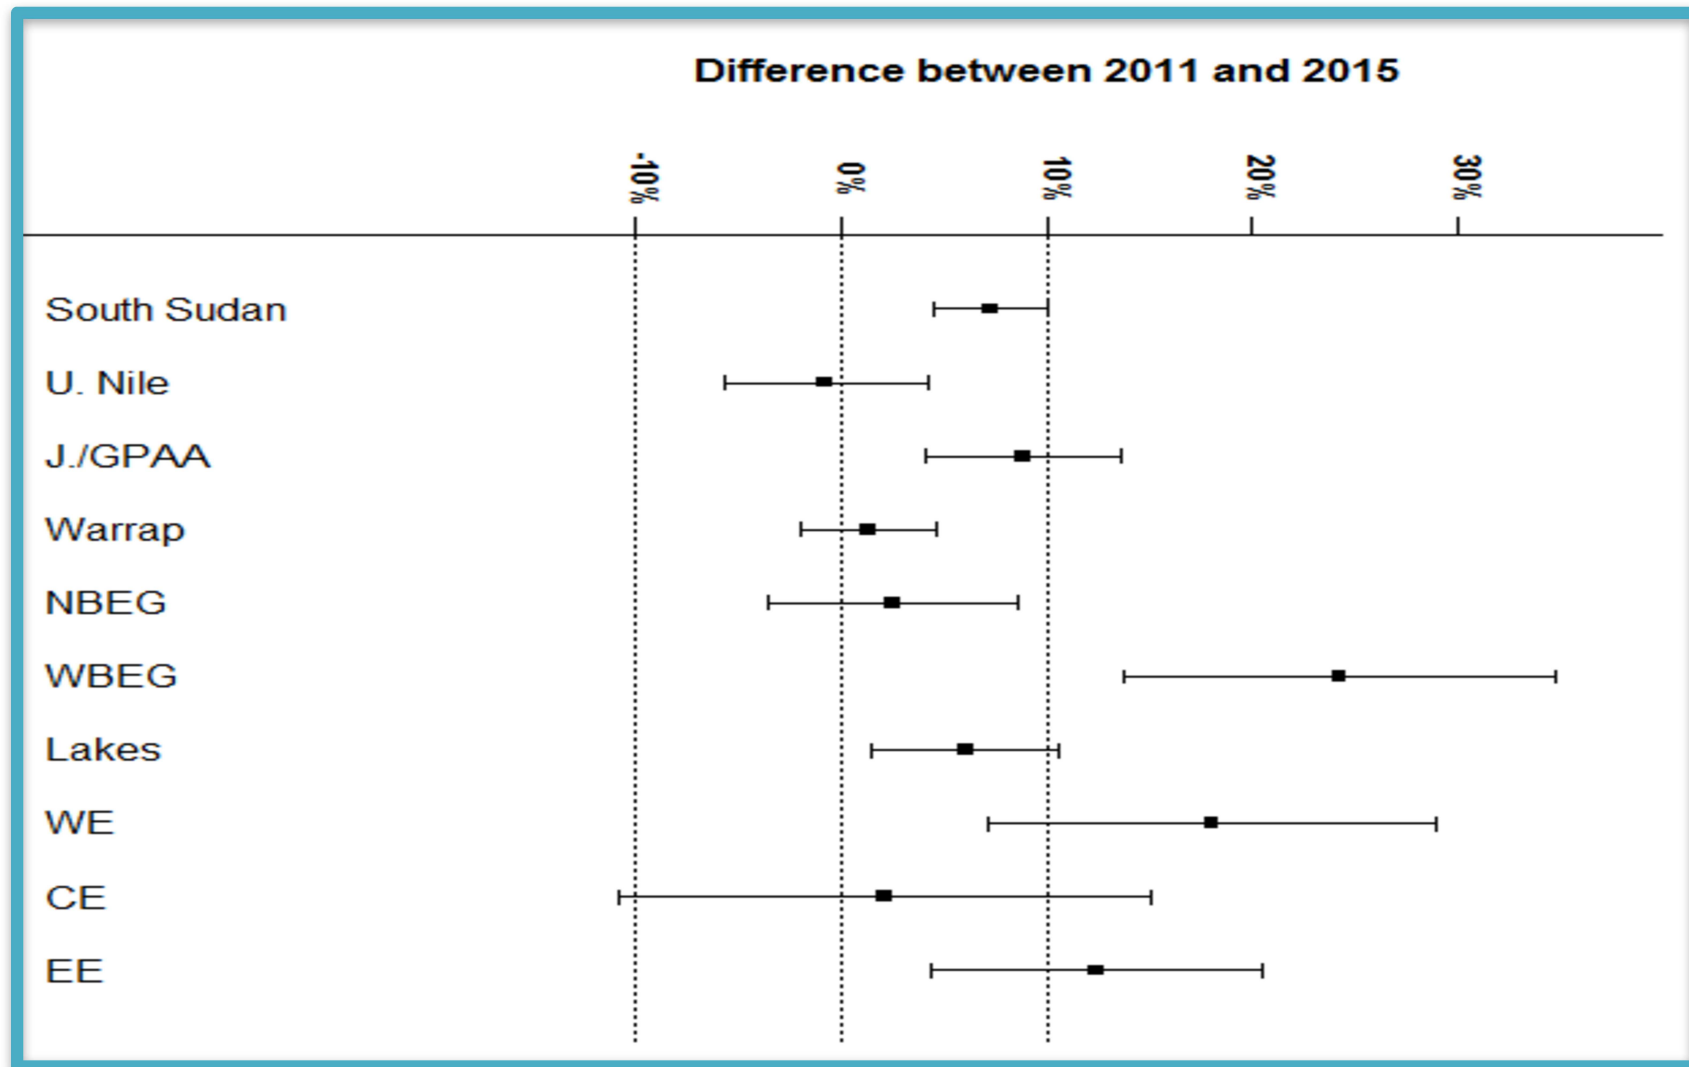

**Figure S15--Difference between LQAS Surveys of 2011 and 2015 for: Proportion of Proportion of men 15-49 years who were tested for HIV in the last 12 months and received their results**

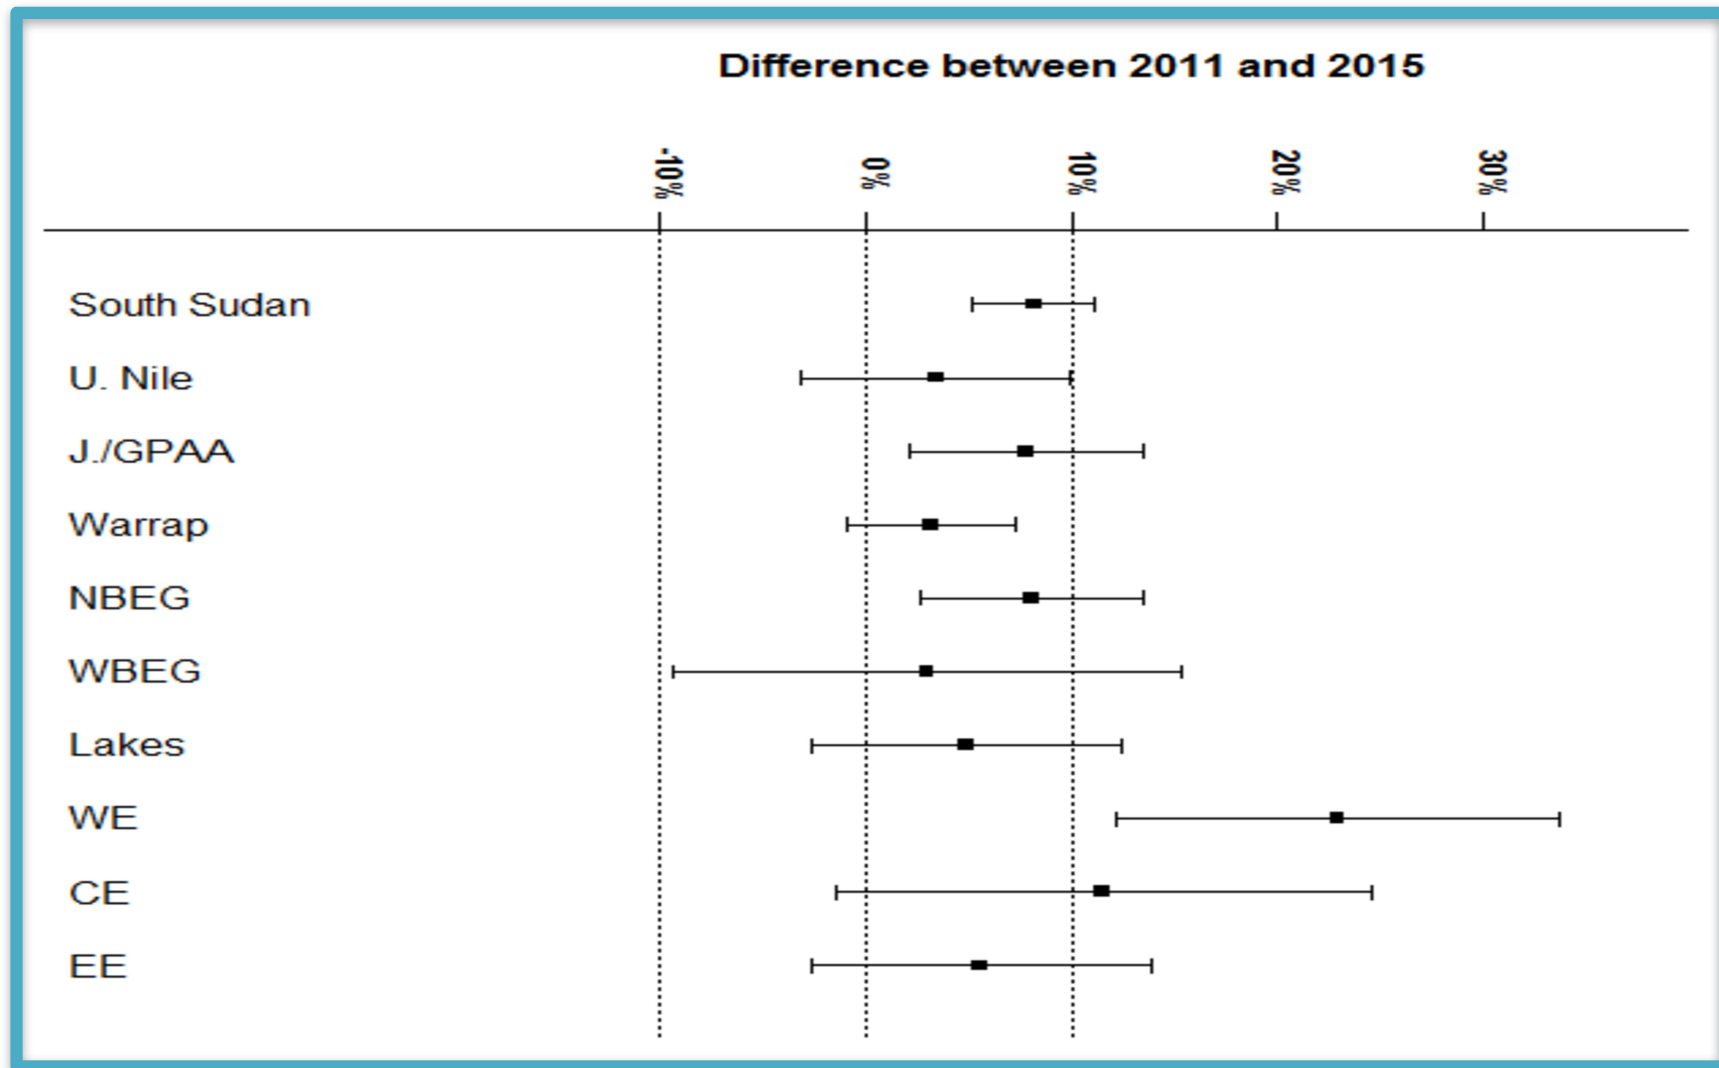

**Figure S16--Difference between LQAS Surveys of 2011 and 2015 for: Proportion of Proportion of women 15-49 years who know at least two ways in which HIV is transmitted from an infected mother to her child**

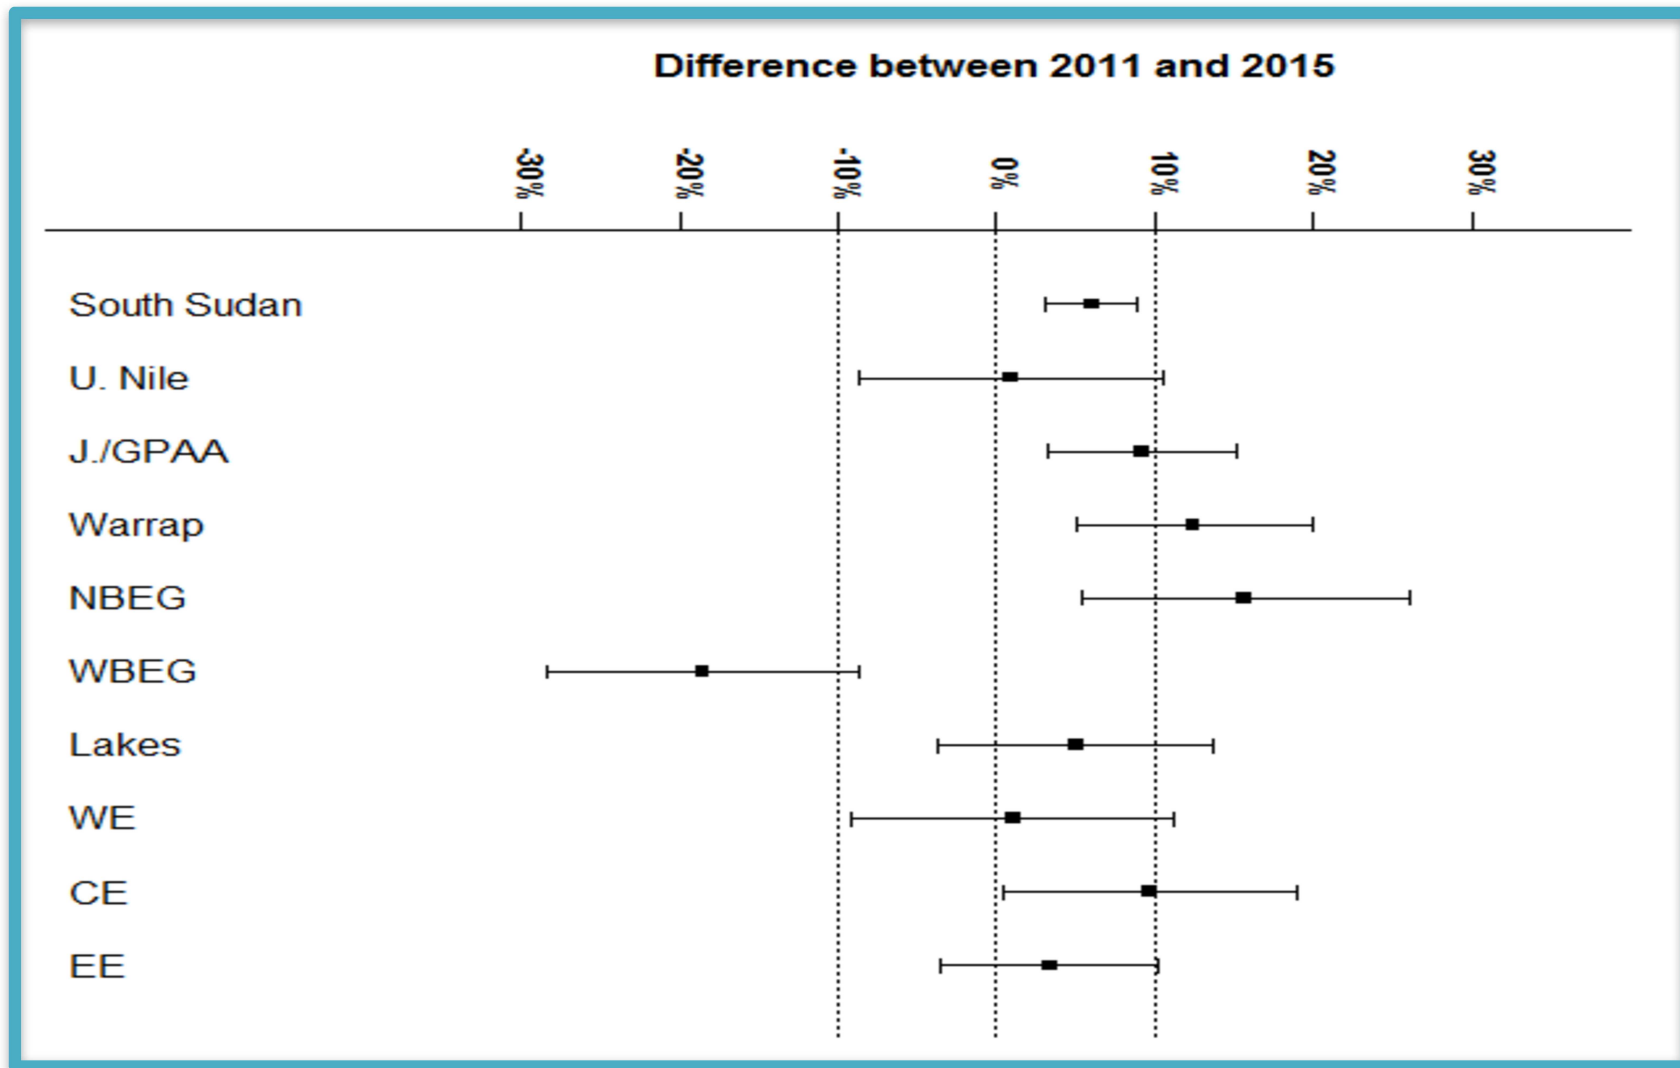

**Figure S17--Difference between LQAS Surveys of 2011 and 2015 for: Proportion of Proportion of men 15-49 years who know at least two ways in which HIV is transmitted from an infected mother to her child**

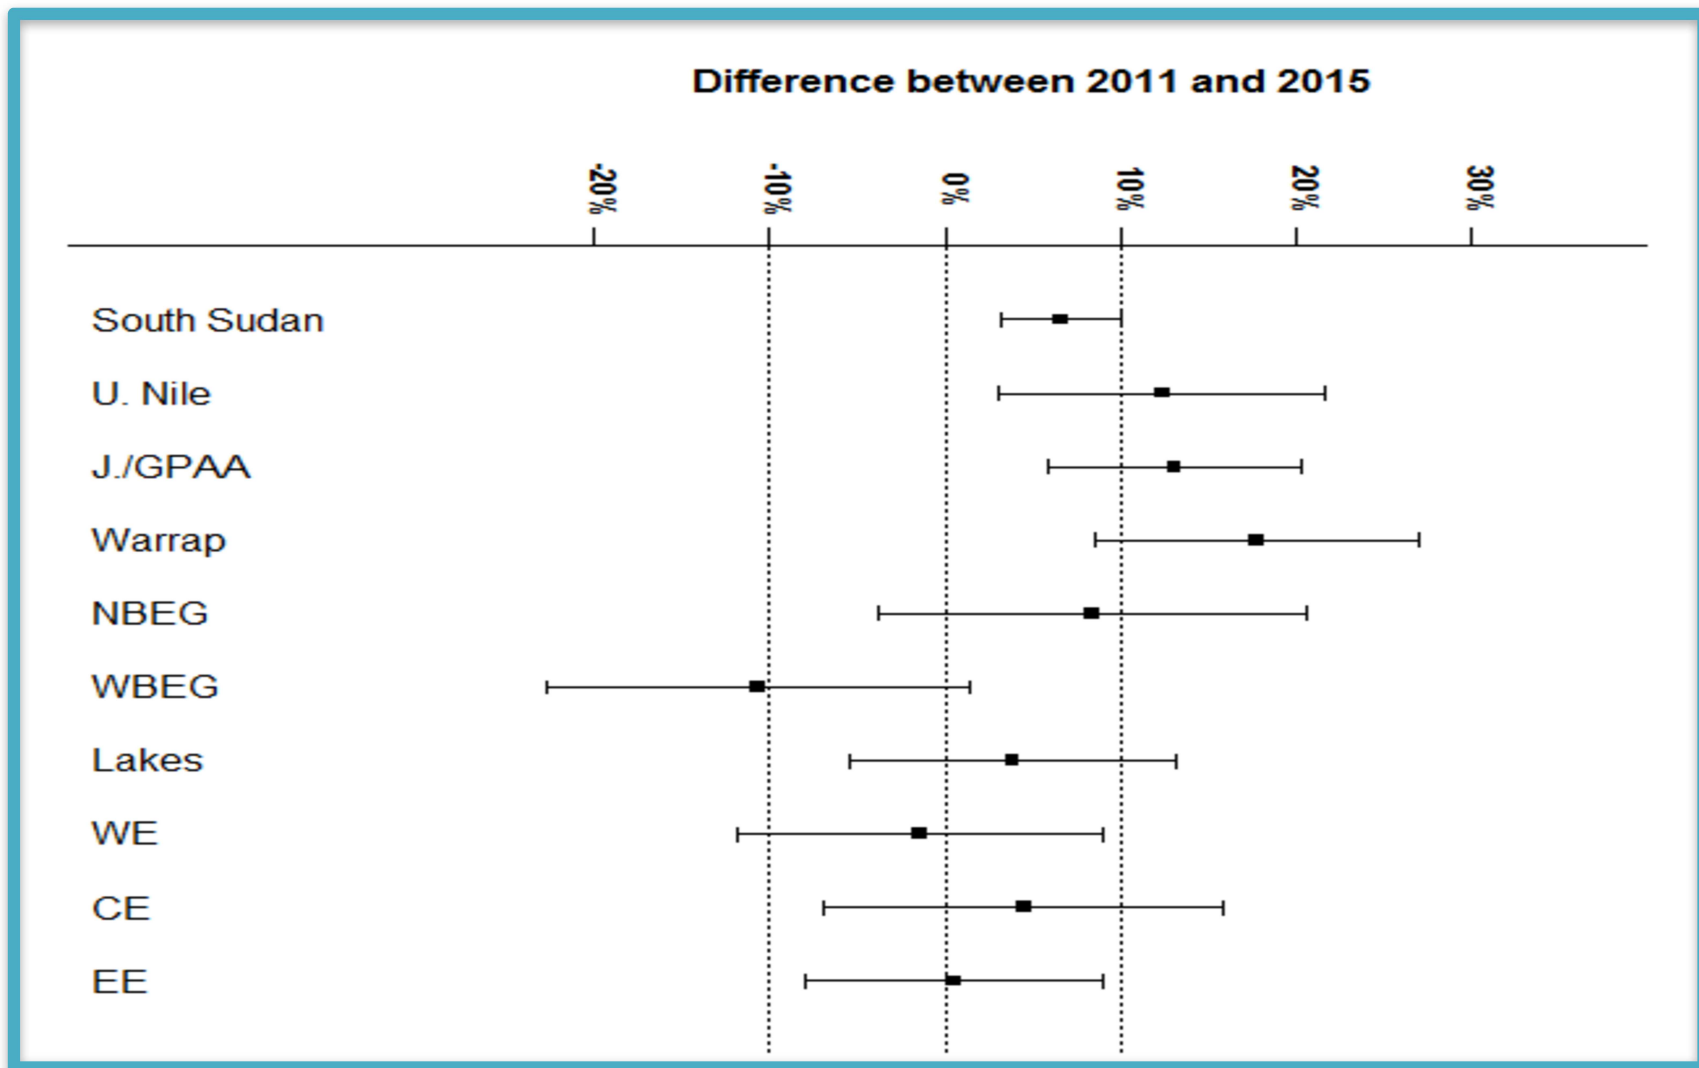

**Figure S18--Difference between LQAS Surveys of 2011 and 2015 for: Proportion of Proportion of women 15-49 years who correctly identify using condom and been faithful as ways of preventing the sexual transmission of HIV**

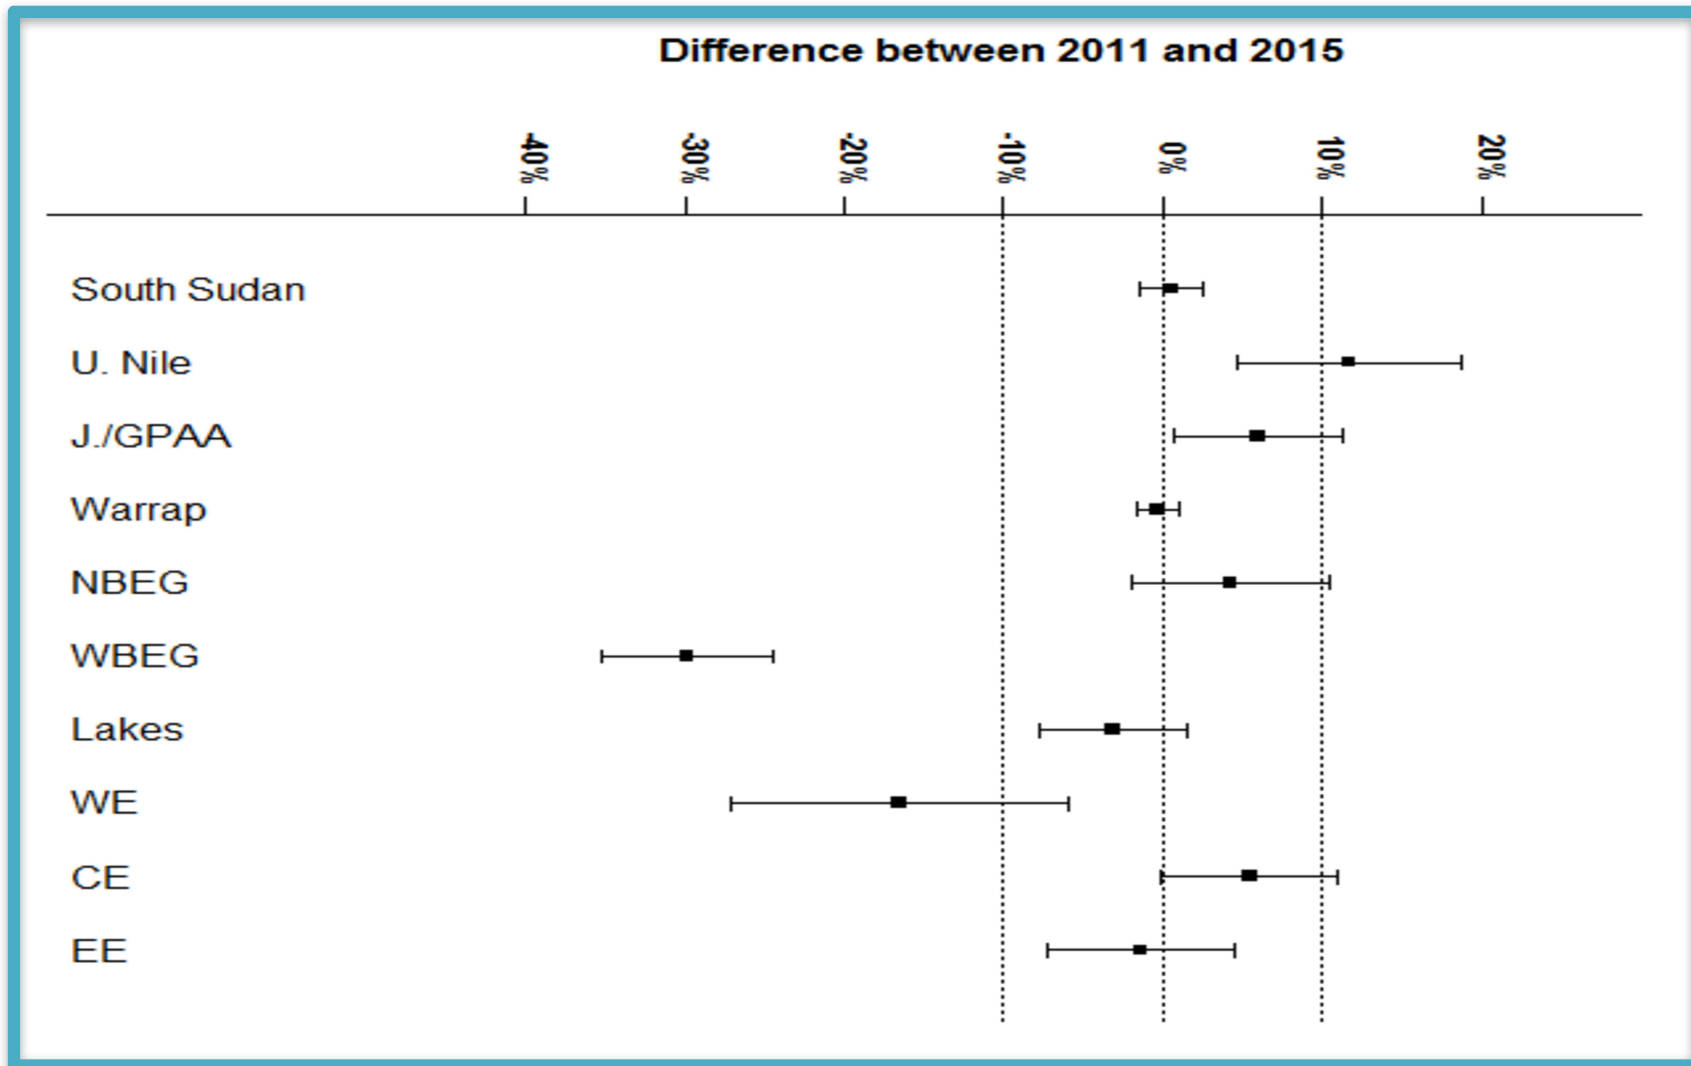

**Figure S19--Difference between LQAS Surveys of 2011 and 2015 for: Proportion of Proportion of men 15-49 years who correctly identify using condom and been faithful as ways of preventing the sexual transmission of HIV**

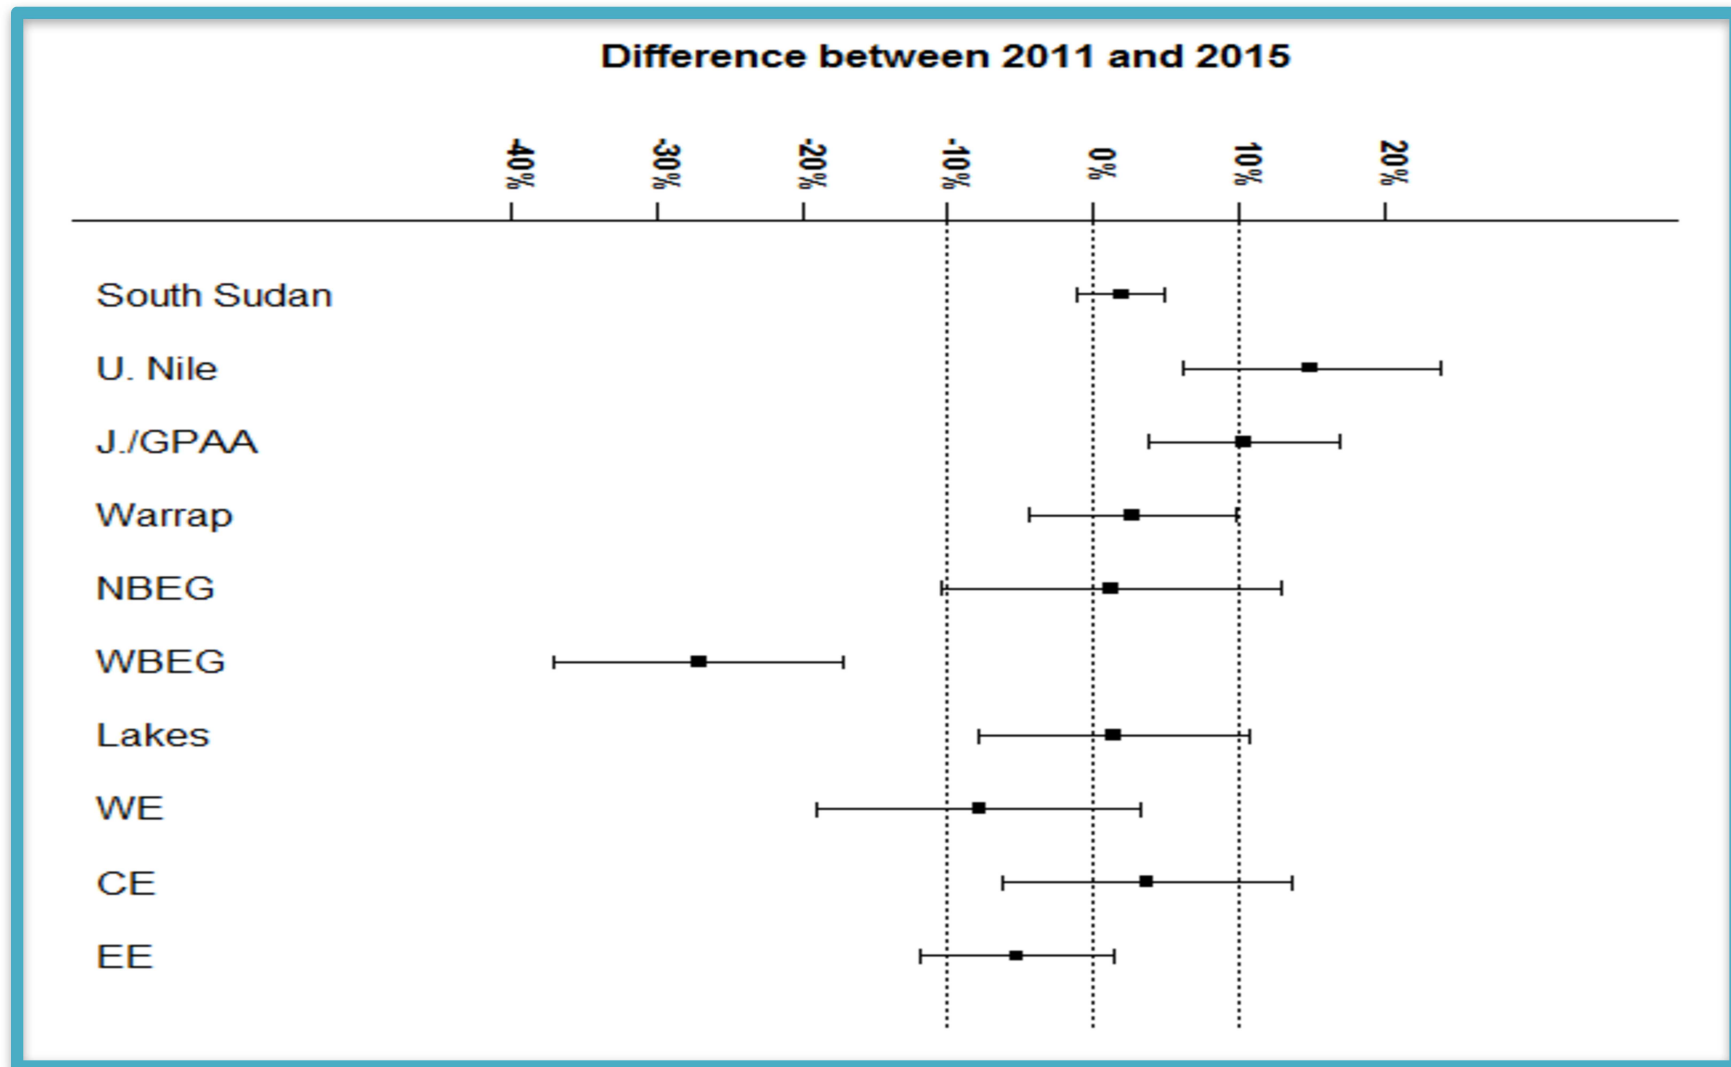

**Figure S20--Difference between LQAS Surveys of 2011 and 2015 for: Proportion of women 15-49 years who correctly reject the misconception that HIV can be transmitted by mosquito bites**

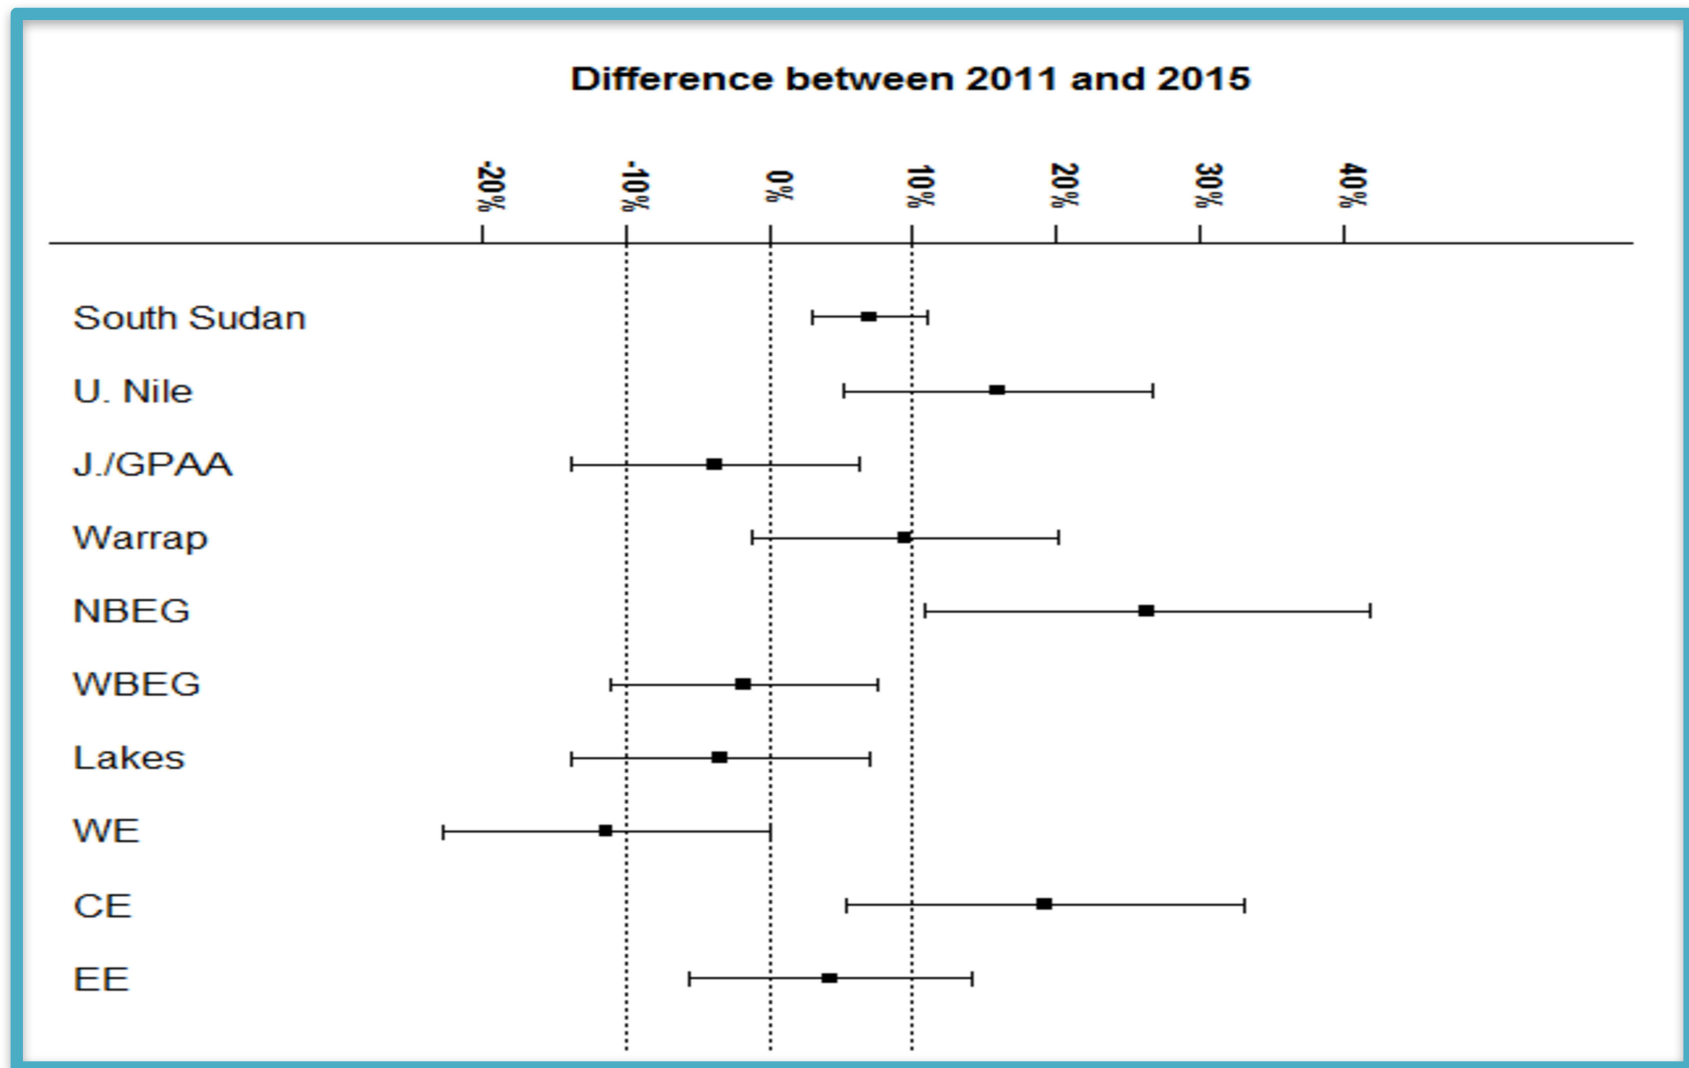



**Figure S21--Difference between LQAS Surveys of 2011 and 2015 for: Proportion of men 15-49 years who correctly reject the misconception that HIV can be transmitted by mosquito bites**

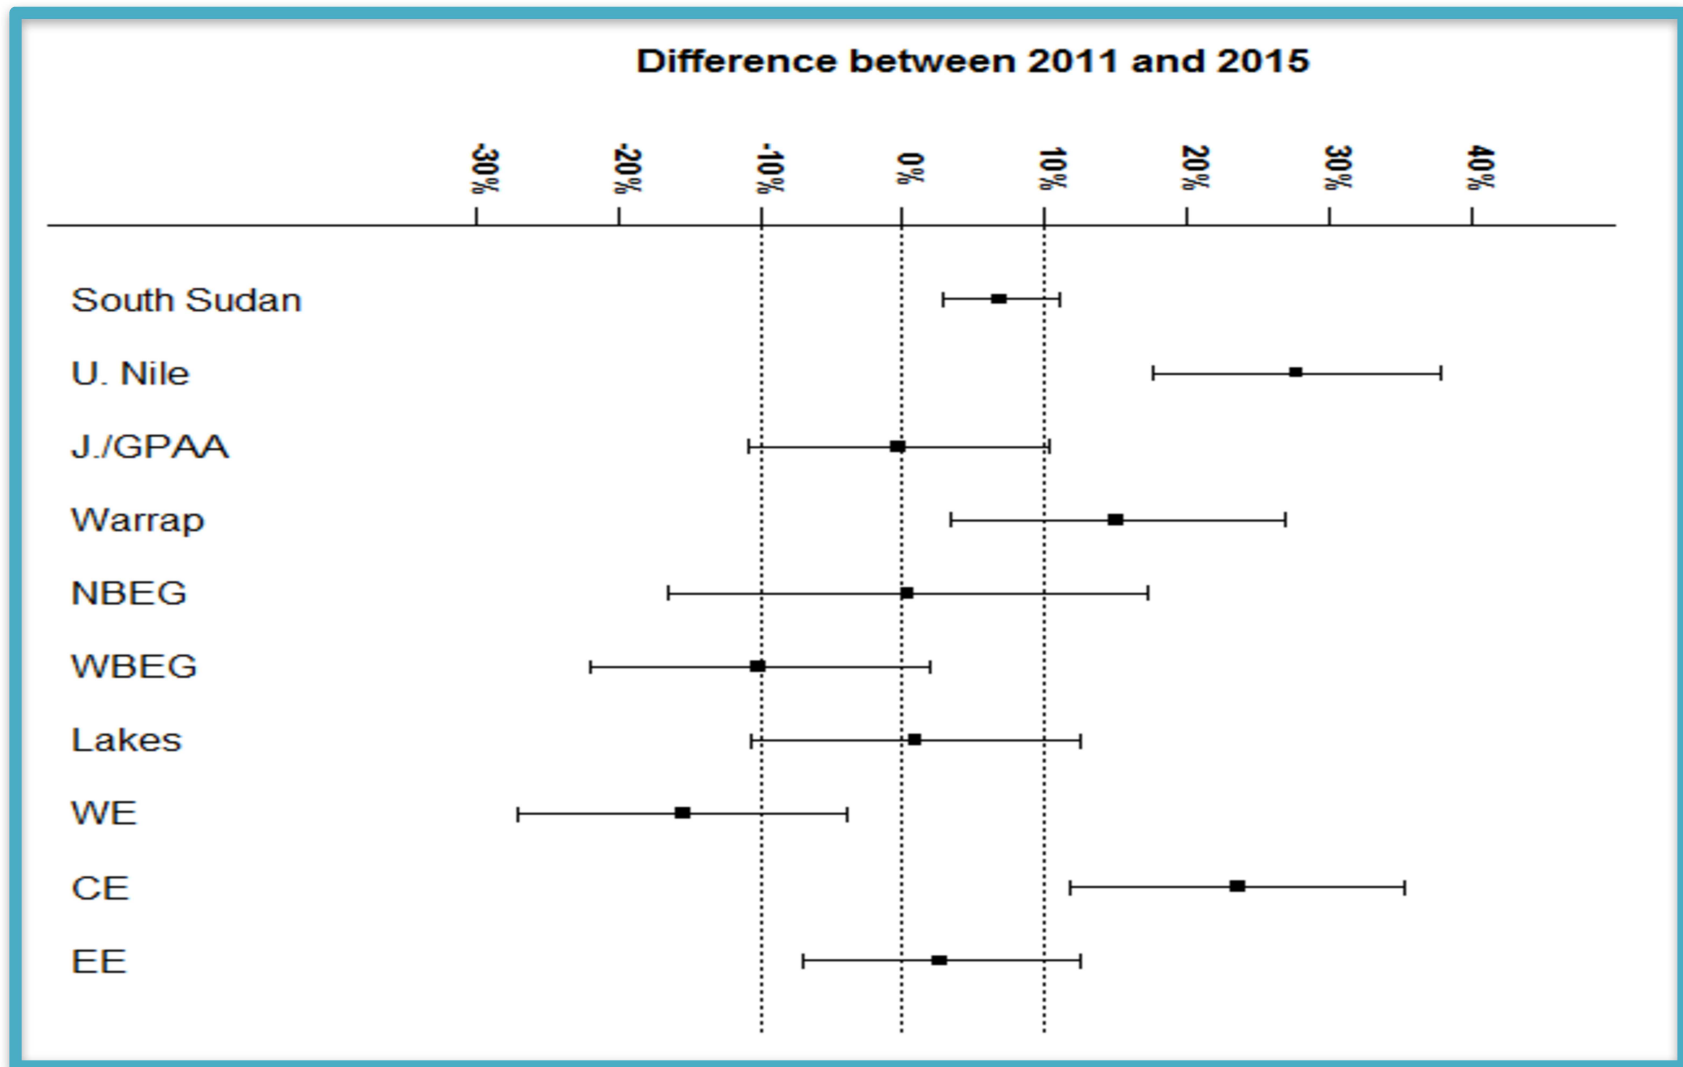

**Figure S22--Difference between LQAS Surveys of 2011 and 2015 for: Proportion of women 15-49 years who correctly reject the misconception that HIV can be transmitted by sharing food with infected person**

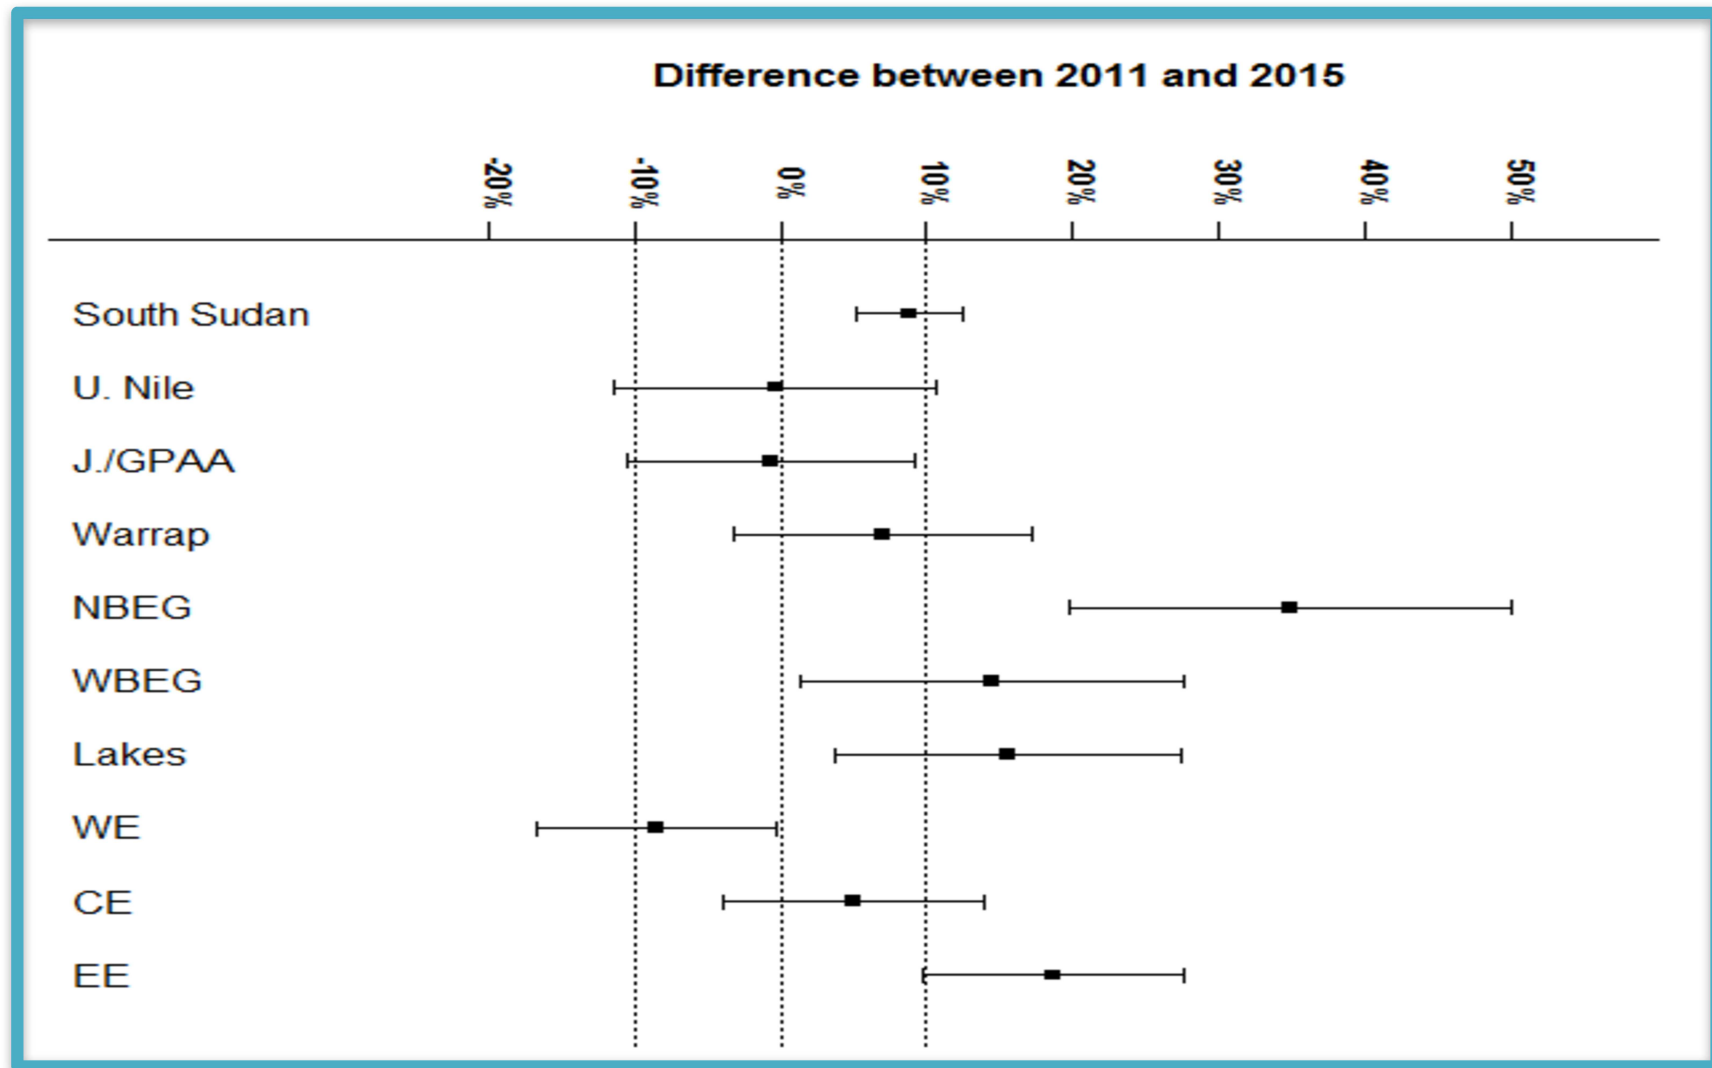

**Figure S23--Difference between LQAS Surveys of 2011 and 2015 for: Proportion of men 15-49 years who correctly reject the misconception that HIV can be transmitted by sharing food with infected person**

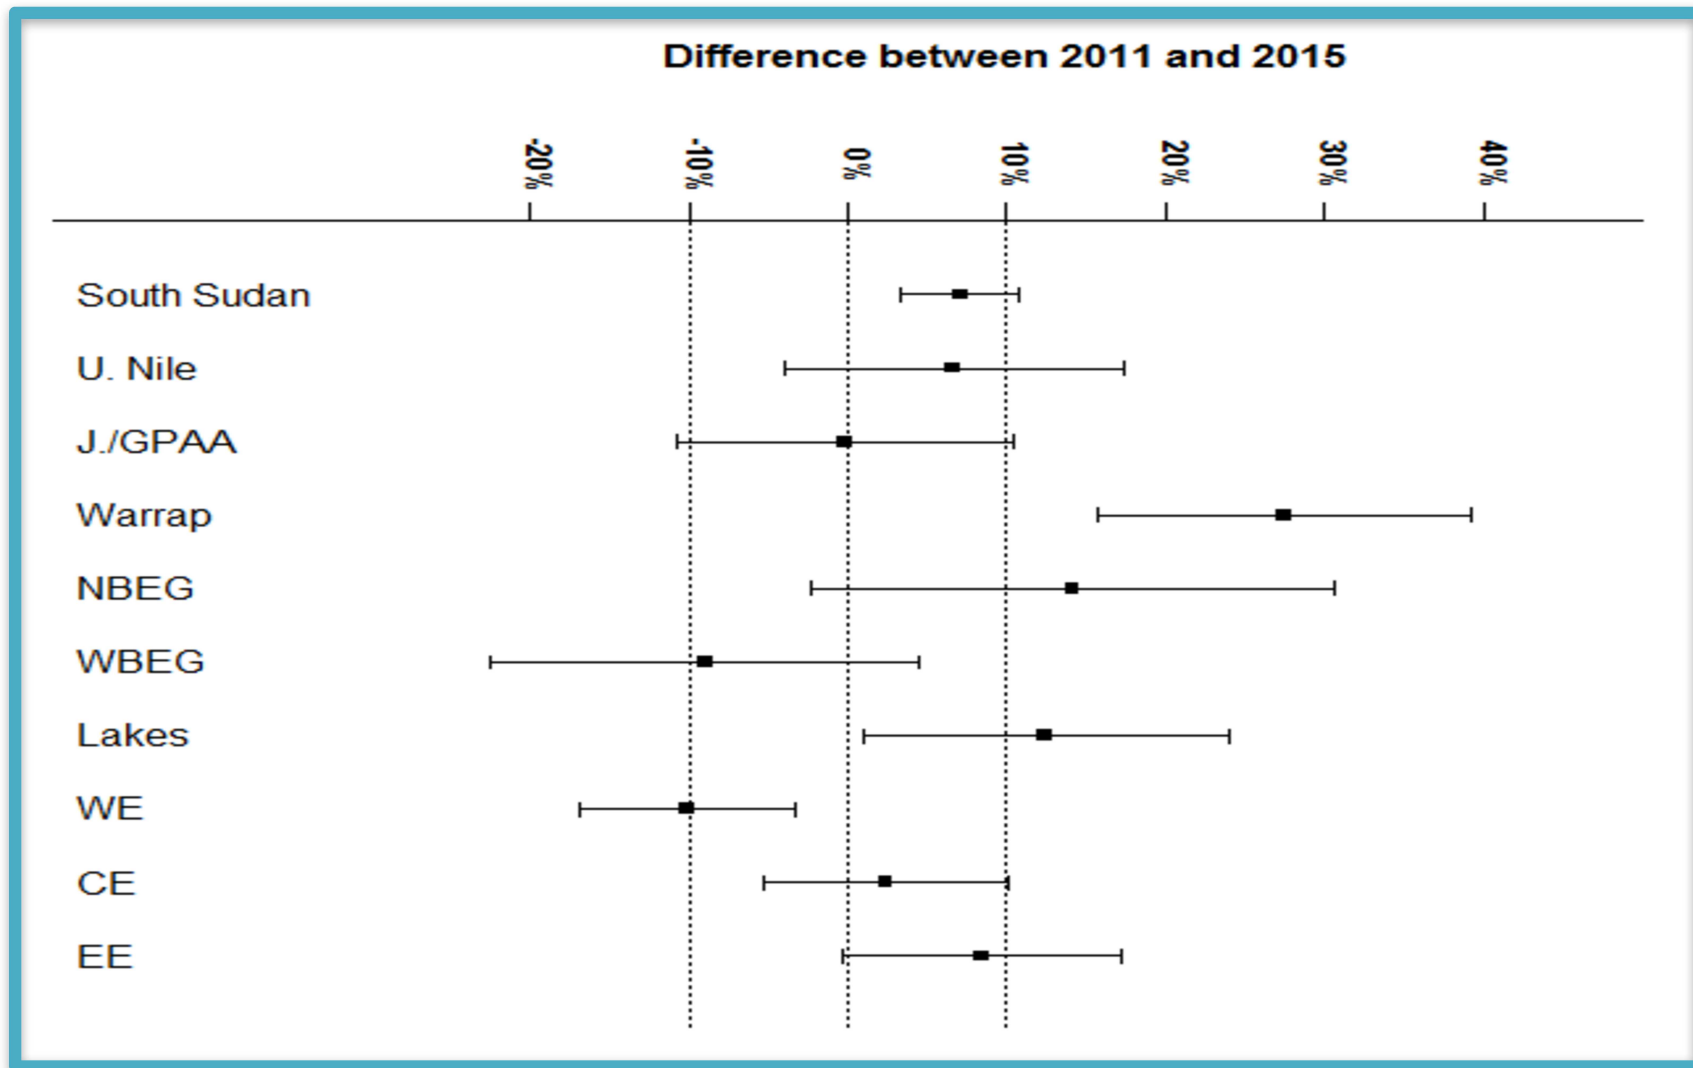

Figure S24--Difference between LQAS Surveys of 2011 and 2015 for: Proportion of f women 15-49 years who correctly reject the misconception that HIV can be transmitted by witchcraft

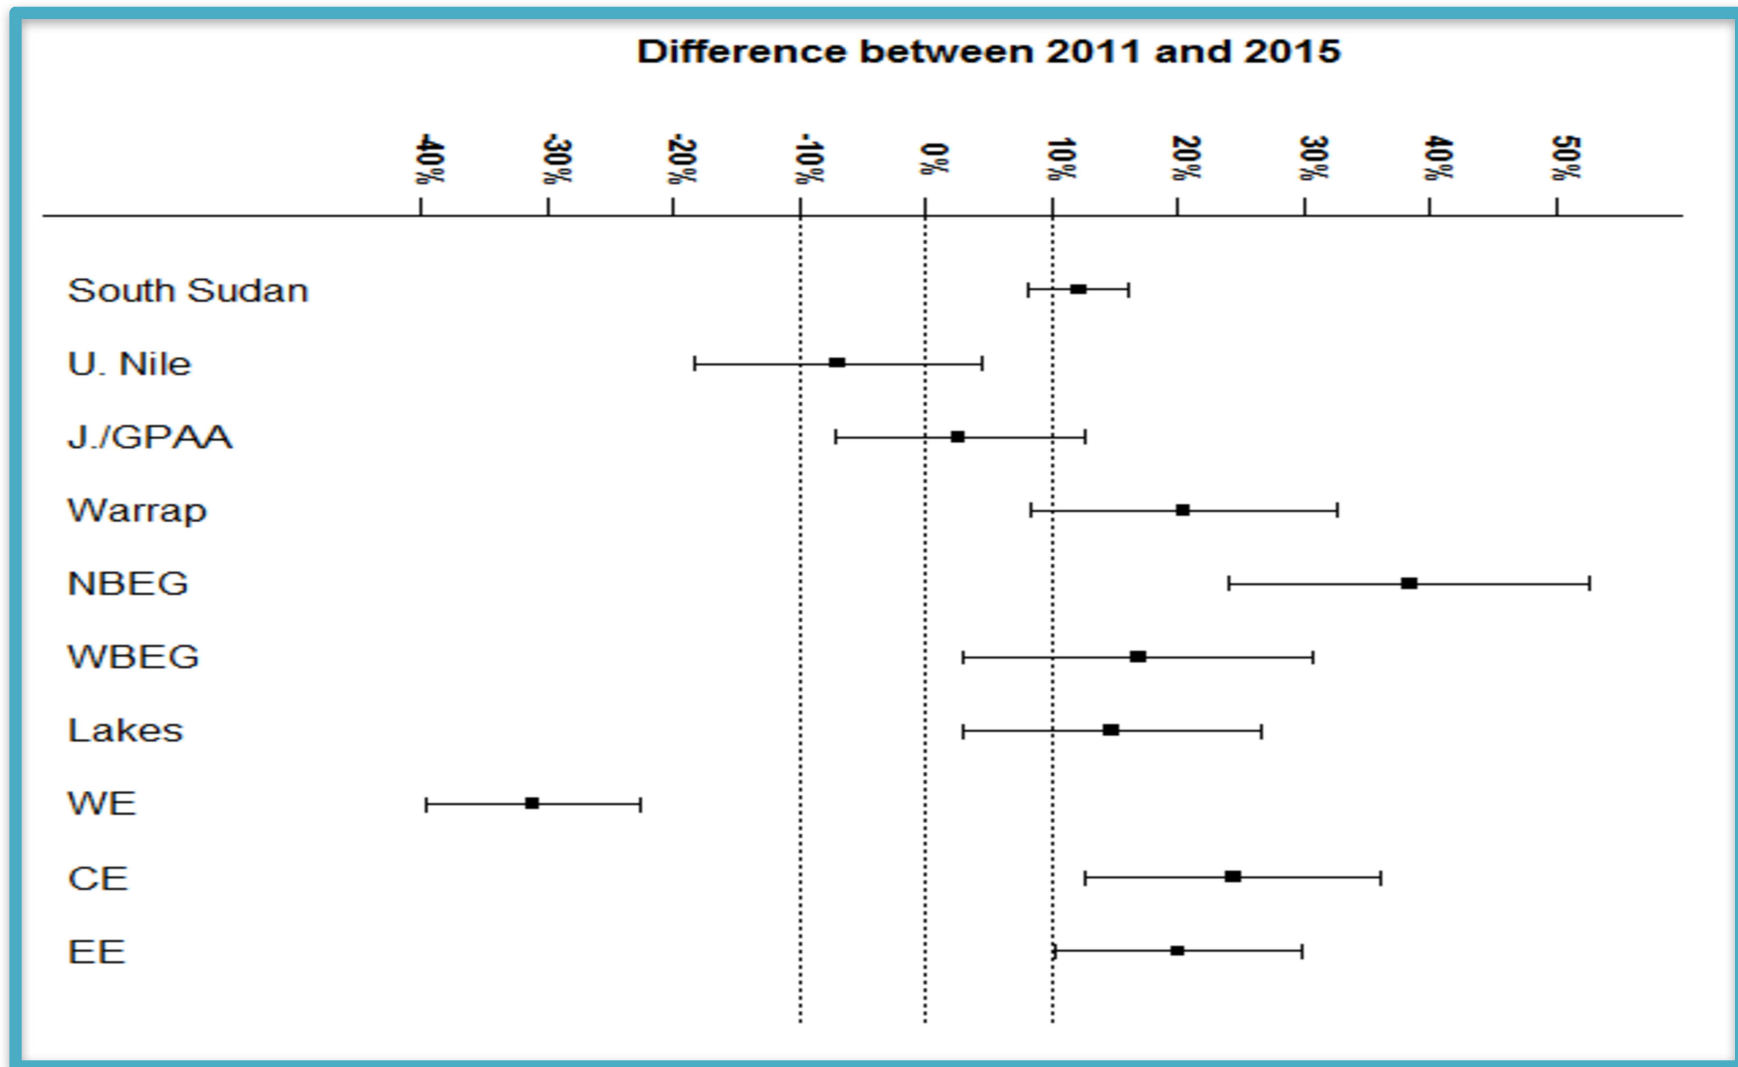

**Figure S25--Difference between LQAS Surveys of 2011 and 2015 for: Proportion of men 15-49 years who correctly reject the misconception that HIV can be transmitted by witchcraft**

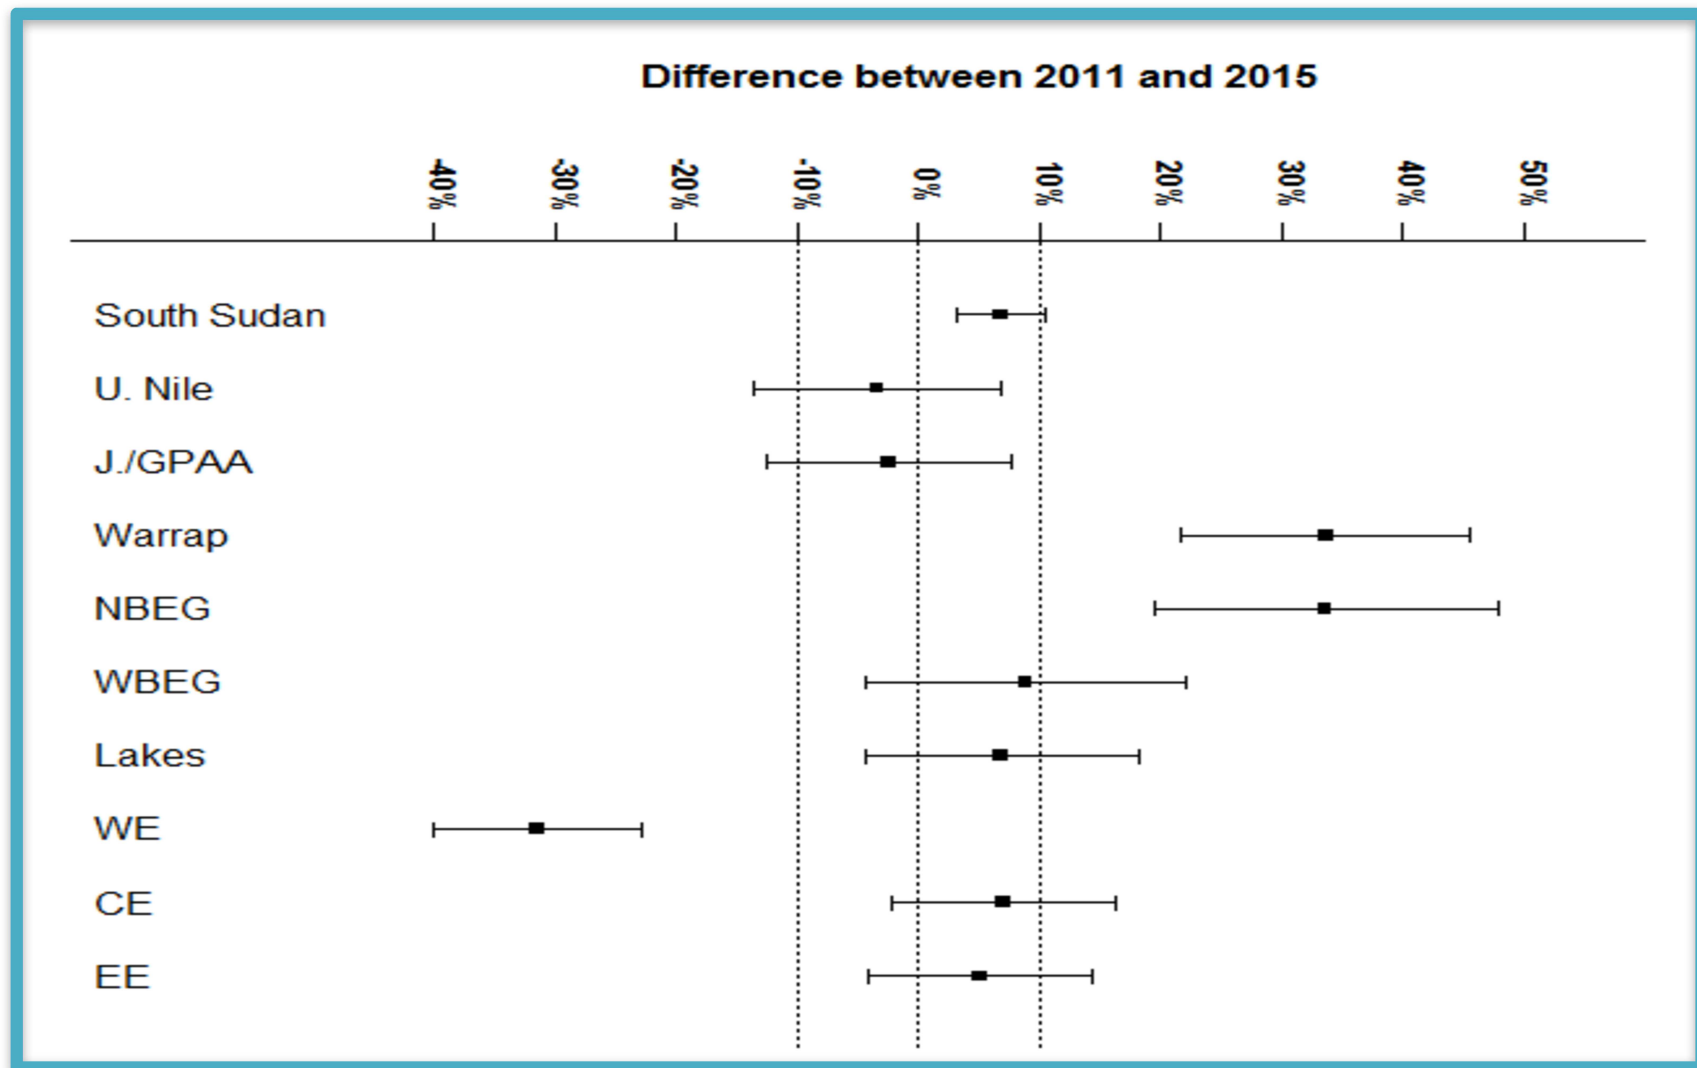

Figure S26--Difference between LQAS Surveys of 2011 and 2015 for: Proportion of Women 15-49 years who know at least two signs/symptoms of STIs in women

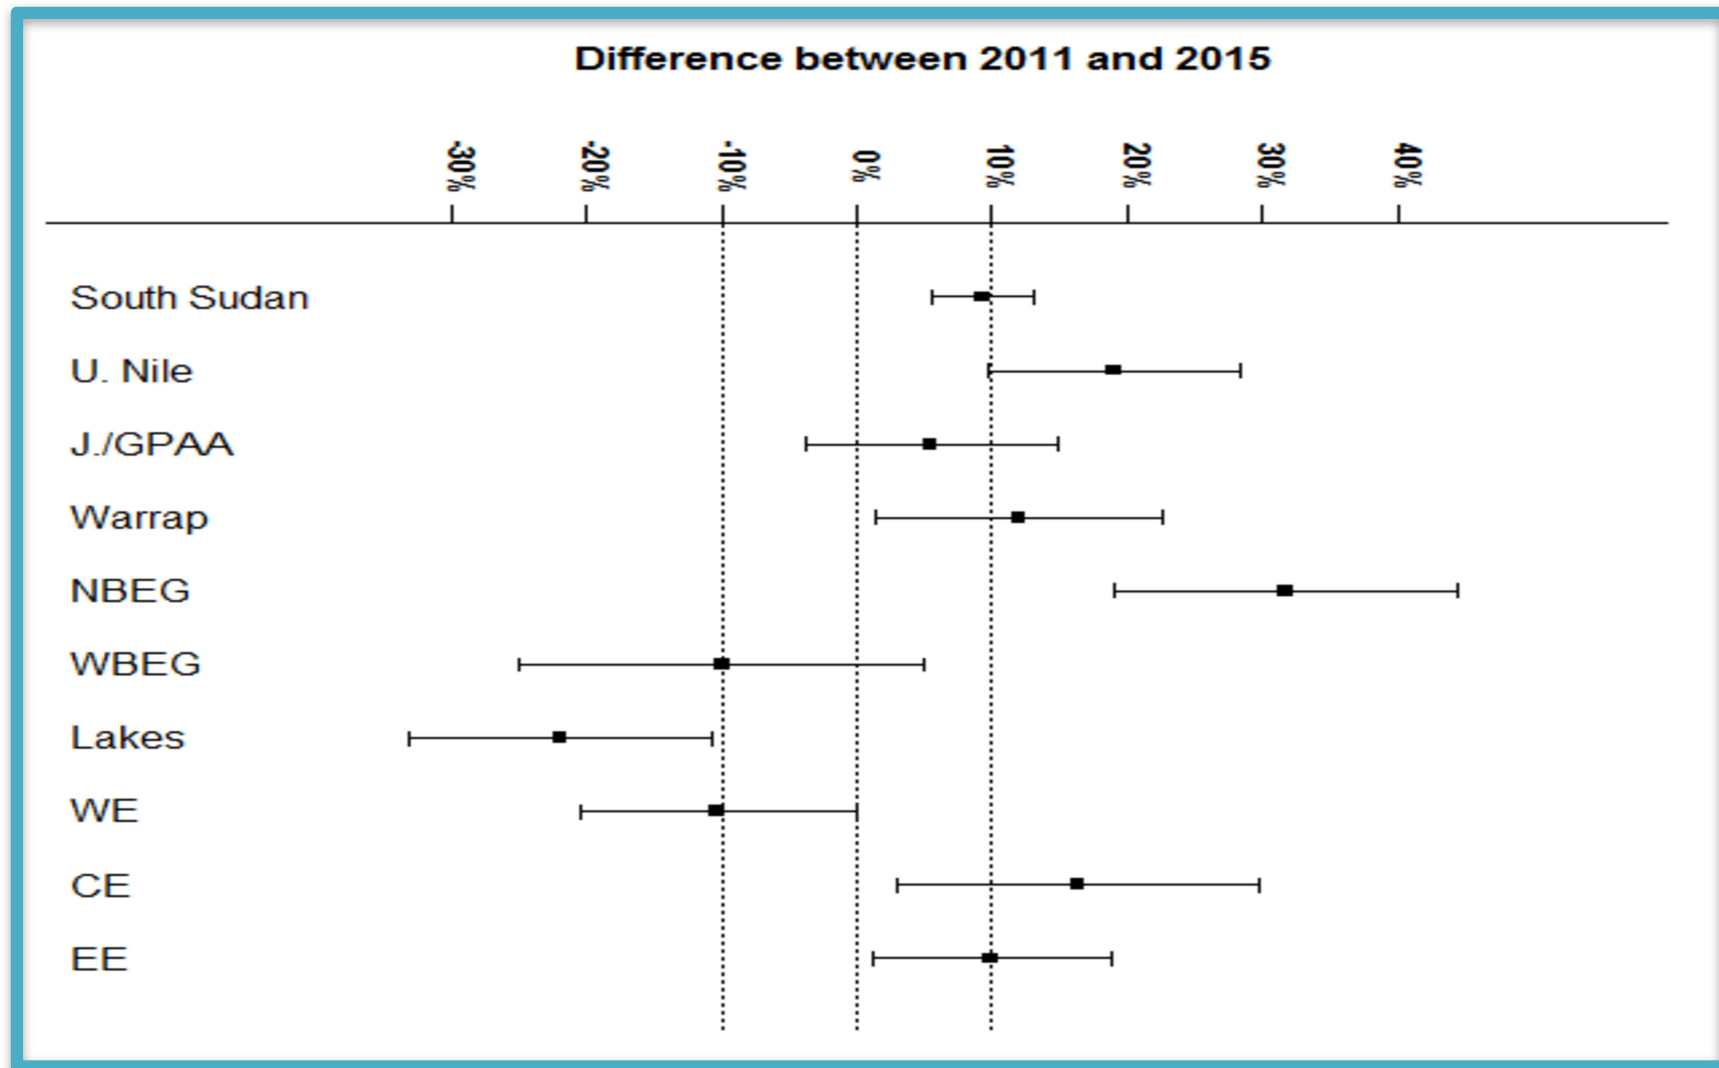

**Figure S27--Difference between LQAS Surveys of 2011 and 2015 for: Proportion of Men 15-49 years who know at least two signs/symptoms of STIs in men**

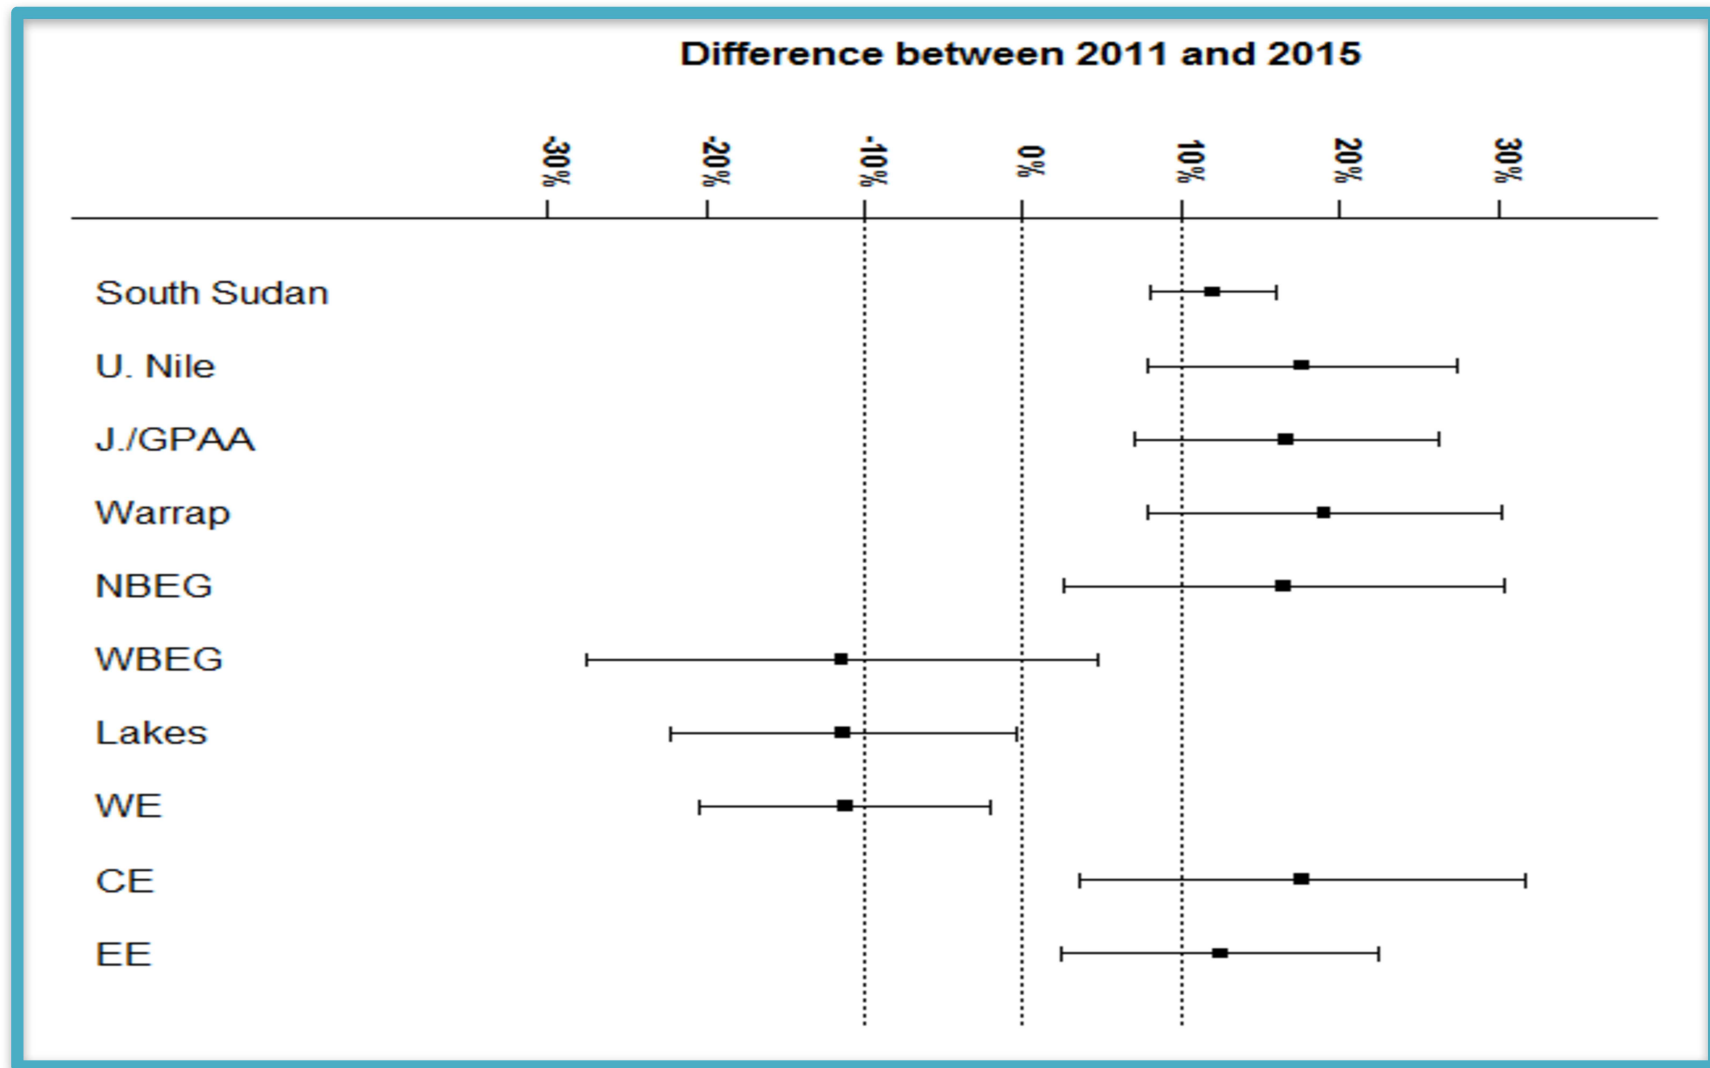

**Figure S28--Difference between LQAS Surveys of 2011 and 2015 for: Proportion of women 15-49 years using any modern family planning method at the time of the survey (Denominator = Exclude pregnant women)**

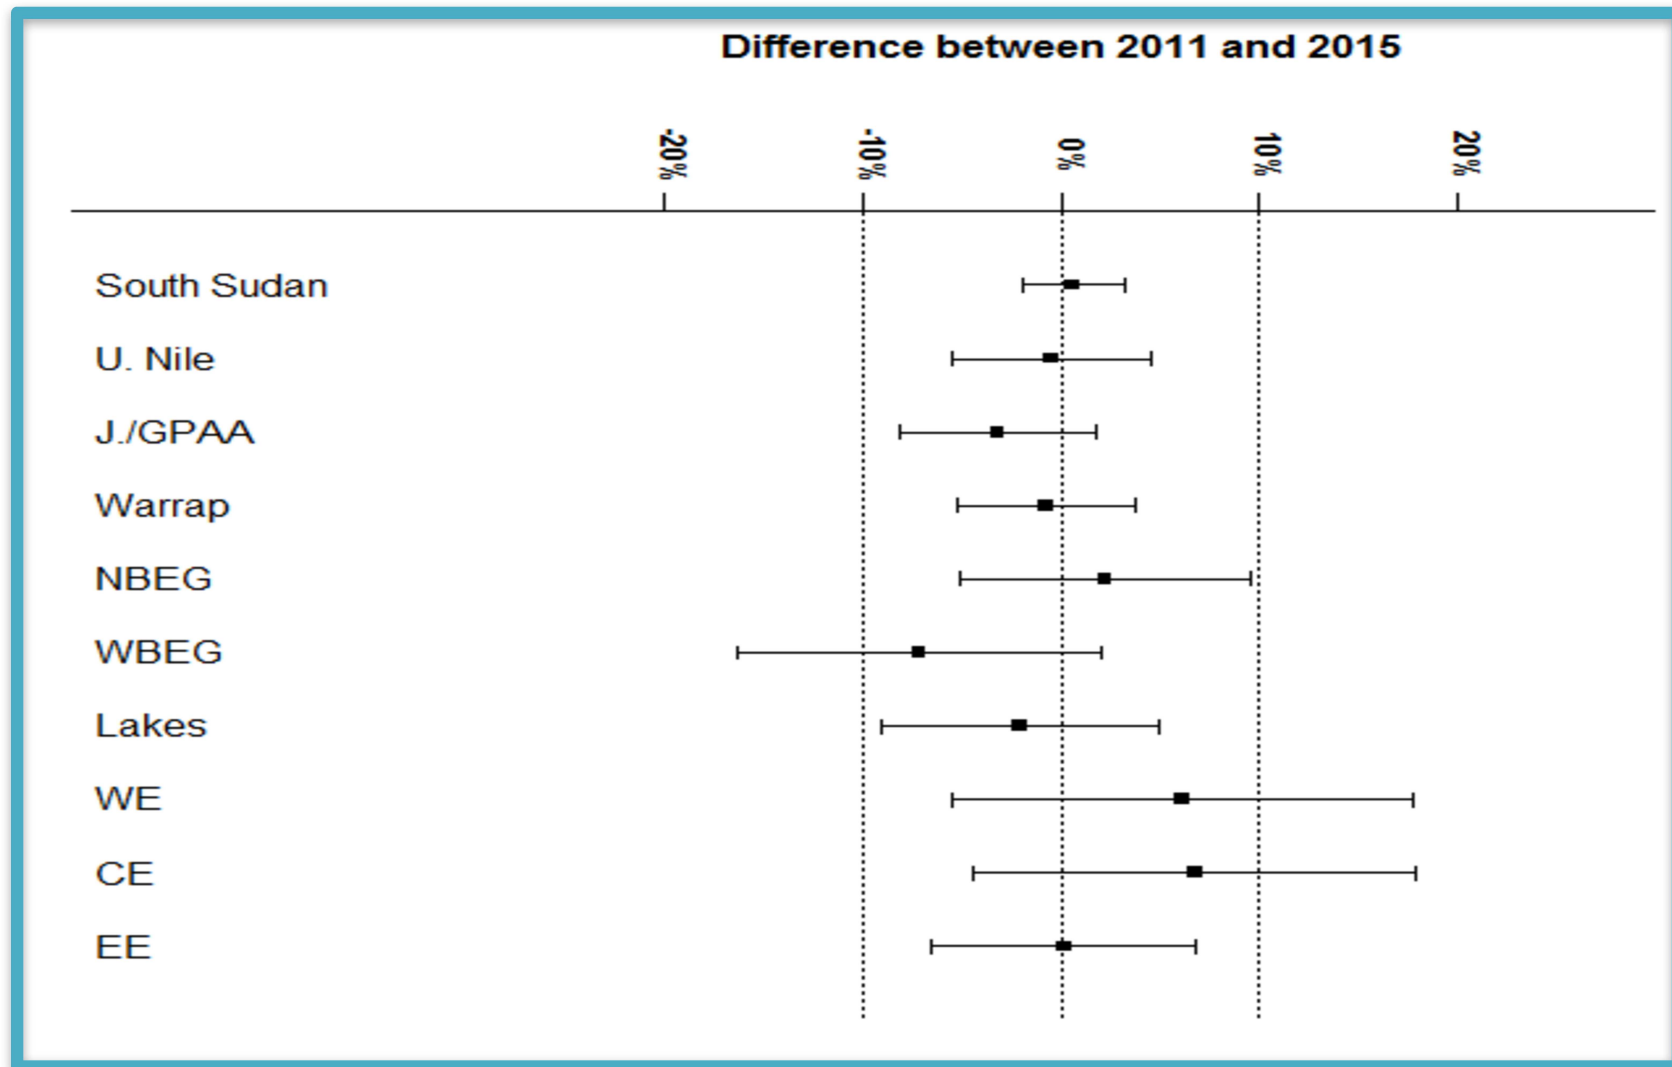

Supplement: bmjgh-2019-002093supp001.pdf [file bmjgh-2019-002093supp001.pdf]
