# Supplementary material for: Is development aid to strengthen health systems during protracted conflict a useful investment? The case of South Sudan, 2011–2015
Source: PubMed Central journal article supplement — BMJ Glob Health. 2020 Apr 15;5(4):e002093. doi: 10.1136/bmjgh-2019-002093 (PMC7199709; doi:10.1136/bmjgh-2019-002093), 2020-04-15
Supplement: bmjgh-2019-002093supp003.pdf [file bmjgh-2019-002093supp003.pdf]

**Table S2. Weighted literacy\* results for eight client populations of South Sudan household survey, 2015**

|           | MoC <12m. |       | MoC 12-23m. |       | MoC 0-59m. |       | Women 15-49y. |       | Men 15-49y. |       | MoC 0-59m. w. fever |       | MoC 0-59m. w. diarrhea |       | MoC 0-59m. w. ARI |       |
|-----------|-----------|-------|-------------|-------|------------|-------|---------------|-------|-------------|-------|---------------------|-------|------------------------|-------|-------------------|-------|
|           | Coverage  | 95%CI | Coverage    | 95%CI | Coverage   | 95%CI | Coverage      | 95%CI | Coverage    | 95%CI | Coverage            | 95%CI | Coverage               | 95%CI | Coverage          | 95%CI |
| S.Sudan   | 10.4%     | 2.0%  | 9.7%        | 1.9%  | 8.8%       | 1.8%  | 11.7%         | 2.1%  | 33.0%       | 2.7%  | 8.6%                | 1.8%  | 8.7%                   | 1.9%  | 8.6%              | 1.9%  |
| UN        | 9.7%      | 5.0%  | 13.7%       | 5.6%  | 8.5%       | 4.4%  | 10.1%         | 5.2%  | 31.5%       | 7.9%  | 6.0%                | 3.9%  | 6.3%                   | 3.5%  | 10.0%             | 5.0%  |
| Jong/GPAA | 3.6%      | 2.2%  | 3.0%        | 2.4%  | 3.0%       | 2.3%  | 5.0%          | 3.2%  | 21.2%       | 5.8%  | 7.1%                | 3.9%  | 3.2%                   | 2.2%  | 2.0%              | 1.5%  |
| Warrap    | 7.6%      | 5.4%  | 5.6%        | 3.9%  | 7.8%       | 5.3%  | 8.2%          | 5.5%  | 27.9%       | 8.3%  | 2.3%                | 2.3%  | 6.4%                   | 5.1%  | 2.9%              | 3.6%  |
| NBeG      | 2.2%      | 3.0%  | 5.4%        | 5.8%  | 2.5%       | 3.3%  | 3.4%          | 3.8%  | 23.0%       | 9.3%  | 1.5%                | 2.5%  | 0.3%                   | 0.6%  | 5.2%              | 4.6%  |
| WBeG      | 10.3%     | 7.8%  | 9.8%        | 7.4%  | 9.1%       | 6.9%  | 10.5%         | 7.1%  | 33.4%       | 10.8% | 7.3%                | 6.2%  | 11.6%                  | 8.0%  | 10.8%             | 7.5%  |
| Lakes     | 5.1%      | 4.0%  | 7.9%        | 5.0%  | 5.7%       | 4.3%  | 11.8%         | 6.0%  | 26.5%       | 7.4%  | 6.2%                | 4.4%  | 4.8%                   | 4.2%  | 7.0%              | 4.8%  |
| WES       | 11.2%     | 4.5%  | 10.2%       | 4.8%  | 10.8%      | 5.2%  | 15.6%         | 4.8%  | 37.8%       | 7.7%  | 12.3%               | 5.3%  | 9.0%                   | 4.2%  | 4.9%              | 3.4%  |
| CES       | 27.3%     | 9.4%  | 22.1%       | 8.6%  | 16.6%      | 7.8%  | 27.1%         | 9.5%  | 61.8%       | 9.5%  | 22.1%               | 8.8%  | 24.1%                  | 9.1%  | 23.4%             | 9.2%  |
| EES       | 13.7%     | 5.9%  | 11.0%       | 5.4%  | 14.7%      | 5.6%  | 11.7%         | 5.4%  | 31.0%       | 6.5%  | 8.4%                | 4.7%  | 10.4%                  | 5.4%  | 10.6%             | 4.9%  |

MoC<12m. = mothers of children aged, MoC 12-23m.= Mothers of children aged 12-23 months, MoC 0-59m.= Mothers of children aged 0-59 months; y.=years, w.=with, S. Sudan= South Sudan, UN=Upper Nile, Jong=Jonglei, GPAA=Greater Pibor Administrative Area, Warr= Warrap, NBeG=Northern Bahr el Ghazal, WBeG=Western Bahr el Ghazal, Lakes=Lakes, WES= Western Equatoria, CES= Central Equatoria, EES= Eastern Equatoria

\* Literacy was assessed by asking respondents to read the following short sentence in their native language: "I am going home to cook food." Coverage estimates reported here are the proportion of respondents that were able to read the whole sentence.
